# Supplementary material for: Theoretical evidence for the enantioselectivity of Mannich reactions with fluorinated aromatic ketones
Source: Royal Society of Chemistry journal article supplement (doi:10.1039/d3cy01519j), 2024-01-01
Supplement: d3cy01519j1.pdf [file d3cy01519j1.pdf]

## *Supporting Information*

# **Mechanistic Evidence for the Enantioselectivity of Mannich Reactions with Fluorinated Aromatic Ketones**

Cheng Peng, Jian Zhang, Yong Wang,\* and Wei Liu\*

Suzhou Key Laboratory of Novel Semiconductor-Optoelectronics Materials and Devices, College of Chemistry, Chemical Engineering and Materials Science, Soochow University, Suzhou, P. R. China

### **CONTENTS**

|                                                                                                                                                                                                                                            |         |
|--------------------------------------------------------------------------------------------------------------------------------------------------------------------------------------------------------------------------------------------|---------|
| Computational Details. ....                                                                                                                                                                                                                | S2      |
| Figure S1. The investigated Mannich reactions of fluorinated aromatic ketones and the results with Zn/( <i>R,R</i> )-prophenol. ....                                                                                                       | S3      |
| Figure S2. Four models for the reaction with Zn/( <i>R,R</i> )-prophenol between $\alpha$ -fluoroketone and pivalaldehyde and Boc-aldimine, and the resulting products, respectively. ....                                                 | S3      |
| Figure S3. EDA for the lowest energy <b>TSs</b> (reaction with Zn/( <i>R,R</i> )-prophenol between $\alpha$ -fluoroketone and pivalaldehyde and Boc-aldimine) calculated at M06L(D3)/6-311+G(2d,p)/PCM(diethylether) level of theory. .... | S4      |
| Figure S4. IRI vs $\text{sign}(\lambda_2)\rho$ scatter plots of transition states. ....                                                                                                                                                    | S5      |
| Figure S5. IRI analyses of transition states (M06L(D3)/6-311+G(2d,p)/PCM(diethylether) level). The blue, green, and red surfaces indicate strong attraction, weak interaction, and steric effects, respectively. ....                      | S6      |
| Figure S6. Intrinsic reaction coordinate (IRC) for transition states. ....                                                                                                                                                                 | S7      |
| SAPT results of transition states. ....                                                                                                                                                                                                    | S8-S13  |
| Cartesian coordinates of transition states. ....                                                                                                                                                                                           | S14-S29 |

Total: 29 Pages

## 1. Computational Details.

All calculations were carried out with the Gaussian09 package<sup>S1</sup> at the density functional theory (DFT) B3LYP-D3 functional<sup>S2</sup> level of the theory with zero damping. Considering the solvent effect (solvent = diethylether), geometry optimizations performed using the on polarizable continuum model<sup>S3</sup> (PCM) were employed by using 6-31G(d) basis set<sup>S4</sup> for all atoms without any symmetry constraint. Frequency calculations were employed at the same level of the theory for each transition state. Key transition states were performed to connect corresponding intermediates. For the single point calculations, the energies were obtained by using the M06L functional with zero Becke-Johnson damping and 6-311++G(2d,p) basis set<sup>S5</sup> was utilized. The symmetry-adapted perturbation theory (SAPT) is performed at the SAPT0 + def2-SVP level of theory on the lowest energy geometries. The data of IRI isosurfaces are produced towards the Multiwfn program<sup>S6</sup> and are showed by the VMD program.<sup>S7</sup> The interaction strength is indicated by the color of the isosurface. The blue, green, and red colors represent strong, weak, and repulsive interaction, respectively.

1. Frisch, M. J.; Trucks, G. W.; Schlegel, H. B.; Scuseria, G. E.; Robb, M. A.; Cheeseman, J. R.; Scalmani, G.; Barone, V.; Mennucci, B.; Petersson, G. A.; Nakatsuji, H.; Caricato, M.; Li, X.; Hratchian, H. P.; Izmaylov, A. F.; Bloino, J.; Zheng, G.; Sonnenberg, J. L.; Hada, M.; Ehara, M.; Toyota, K.; Fukuda, R.; Hasegawa, J.; Ishida, M.; Nakajima, T.; Honda, Y.; Kitao, O.; Nakai, H.; Vreven, T.; Montgomery, J. A., Jr.; Peralta, J. E.; Ogliaro, F.; Bearpark, M.; Heyd, J. J.; Brothers, E.; Kudin, K. N.; Staroverov, V. N.; Kobayashi, R.; Normand, J.; Raghavachari, K.; Rendell, A.; Burant, J. C.; Iyengar, S. S.; Tomasi, J.; Cossi, M.; Rega, N.; Millam, J. M.; Klene, M.; Knox, J. E.; Cross, J. B.; Bakken, V.; Adamo, C.; Jaramillo, J.; Gomperts, R.; Stratmann, R. E.; Yazyev, O.; Austin, A. J.; Cammi, R.; Pomelli, C.; Ochterski, J. W.; Martin, R. L.; Morokuma, K.; Zakrzewski, V. G.; Voth, G. A.; Salvador, P.; Dannenberg, J. J.; Dapprich, S.; Daniels, A. D.; Farkas, O.; Foresman, J. B.; Ortiz, J. V.; Cioslowski, J.; Fox, D. J. *Gaussian 09*, revision D.01 Gaussian, Inc.: Wallingford, CT, 2013

S2 (a) Vosko, S. H.; Wilk, L.; Nusair, M. *Can. J. Phys.* **1980**, *58*, 1200. (b) Stephens, P. J.; Devlin, F. J.; Chabalowski, C. F.; Frisch, M. J. *J. Phys. Chem.* **1994**, *98*, 11623. (c) Becke, A. D. *J. Chem. Phys.* **1993**, *98*, 5648. (d) Lee, C.; Yang, W.; Parr, R. G. *Phys. Rev. B.* **1988**, *37*, 785. (d) Grimme, S.; Antony, J.; Ehrlich, S.; Krieg, H. *J. Chem. Phys.* **2010**, *132*, 154104.

S3 Miertuš, S.; Scrocco, E.; Tomasi, J. *J. Chem. Phys.* **1981**, *55*, 117.

S4 (a) Ditchfield, R.; Hehre, W. J.; Pople, J. A. *J. Chem. Phys.* **1971**, *54*, 724. (b) Hariharan, P. C., Pople, J. A. *Theor. Chim. Acta* **1973**, *28*, 213. (c) Hehre, W. J., Ditchfield, R., Pople, J. A. *J. Chem. Phys.* **1972**, *56*, 2257. (d) Rassolov, Vitaly A., Pople, John A., Ratner, Mark A., Windus, Theresa L. *J. Chem. Phys.* **1998**, *109*, 1223.

S5 (a) Clark, Timothy, Chandrasekhar, Jayaraman, Spitznagel, Günther W., Schleyer, P. Von Ragué J. Comput. Chem. **1983**, *4*, 294. (b) Krishnan, R., Binkley, J. S., Seeger, R., Pople, J. A. *J. Chem. Phys.* **1980**, *72*, 650.

S6 Lu, T.; Chen, F. W. *J. Comput. Chem.* **2012**, *33*, 580.

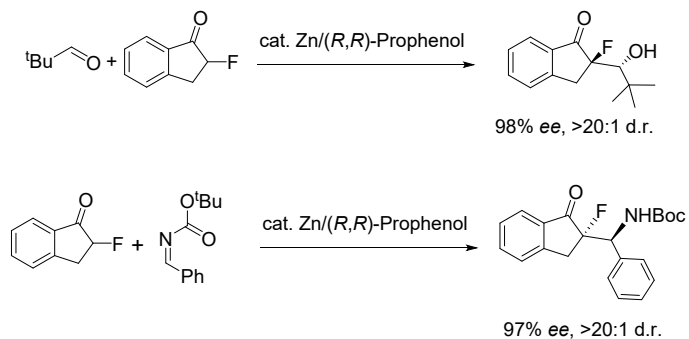

**Figure S1.** The investigated Mannich reactions of fluorinated aromatic ketones and their results with Zn/(*R,R*)-prophenol.

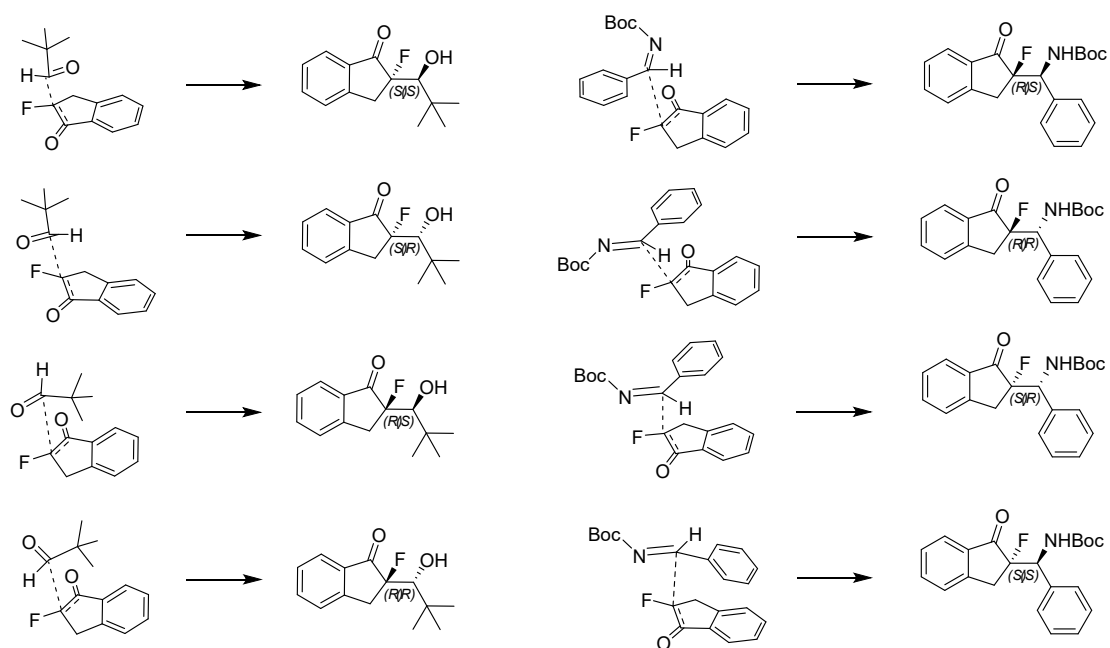

**Figure S2.** Four models for the reaction with Zn/(*R,R*)-prophenol between  $\alpha$ -fluoroketone and pivalaldehyde and Boc-aldimine, and the resulting products, respectively.

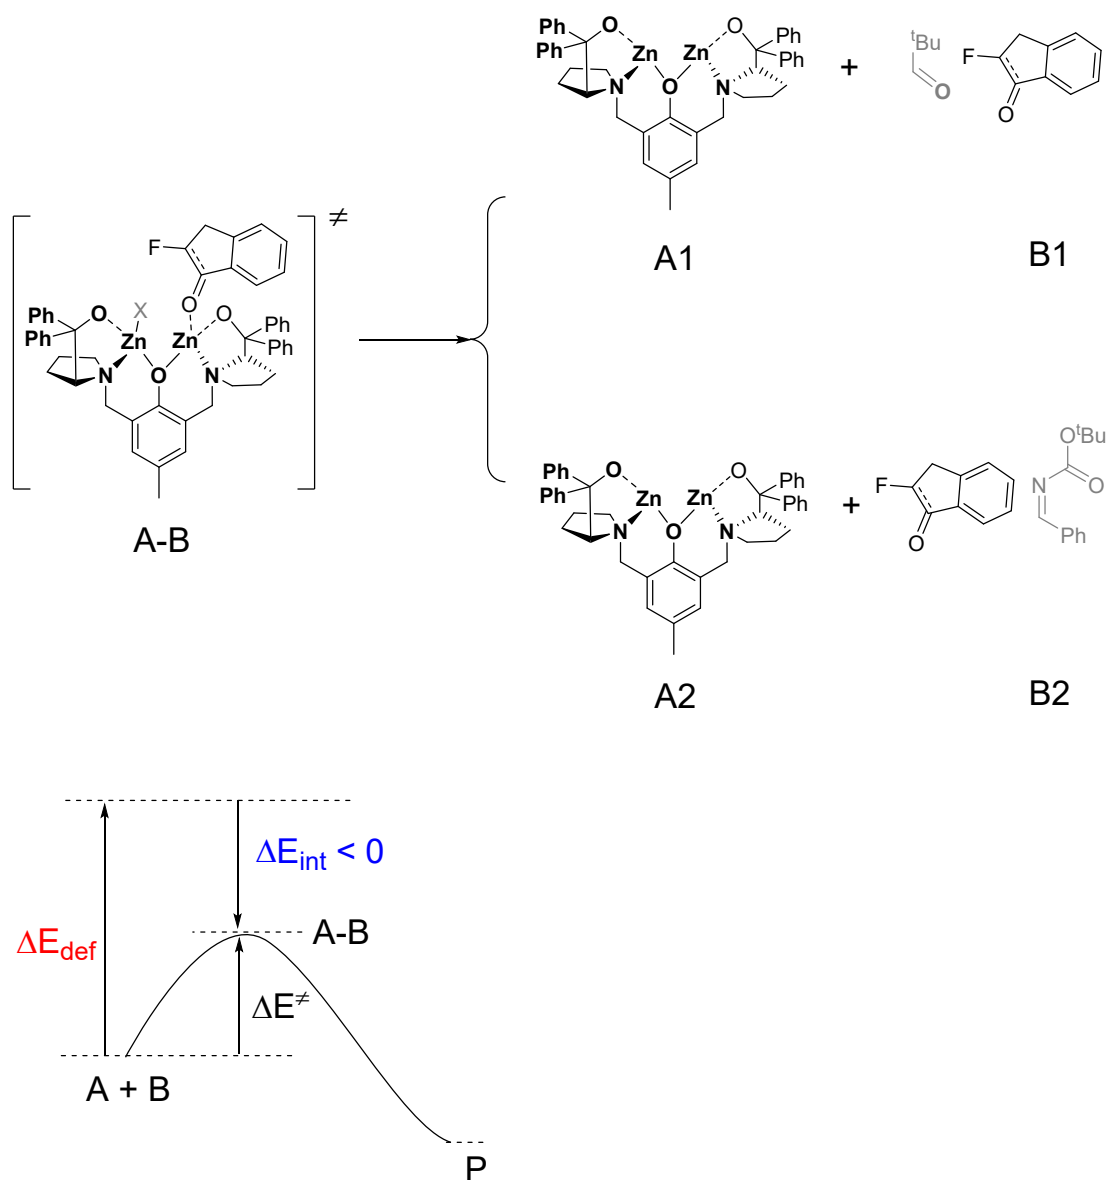

**Figure S3.** ASM for the lowest energy TSs (reaction with  $\text{Zn}/(R,R)$ -prophenol between  $\alpha$ -fluoroketone and pivalaldehyde and Boc-alimine) calculated at M06L(D3)/6-311+G(2d,p)/PCM(diethylether) level of theory.

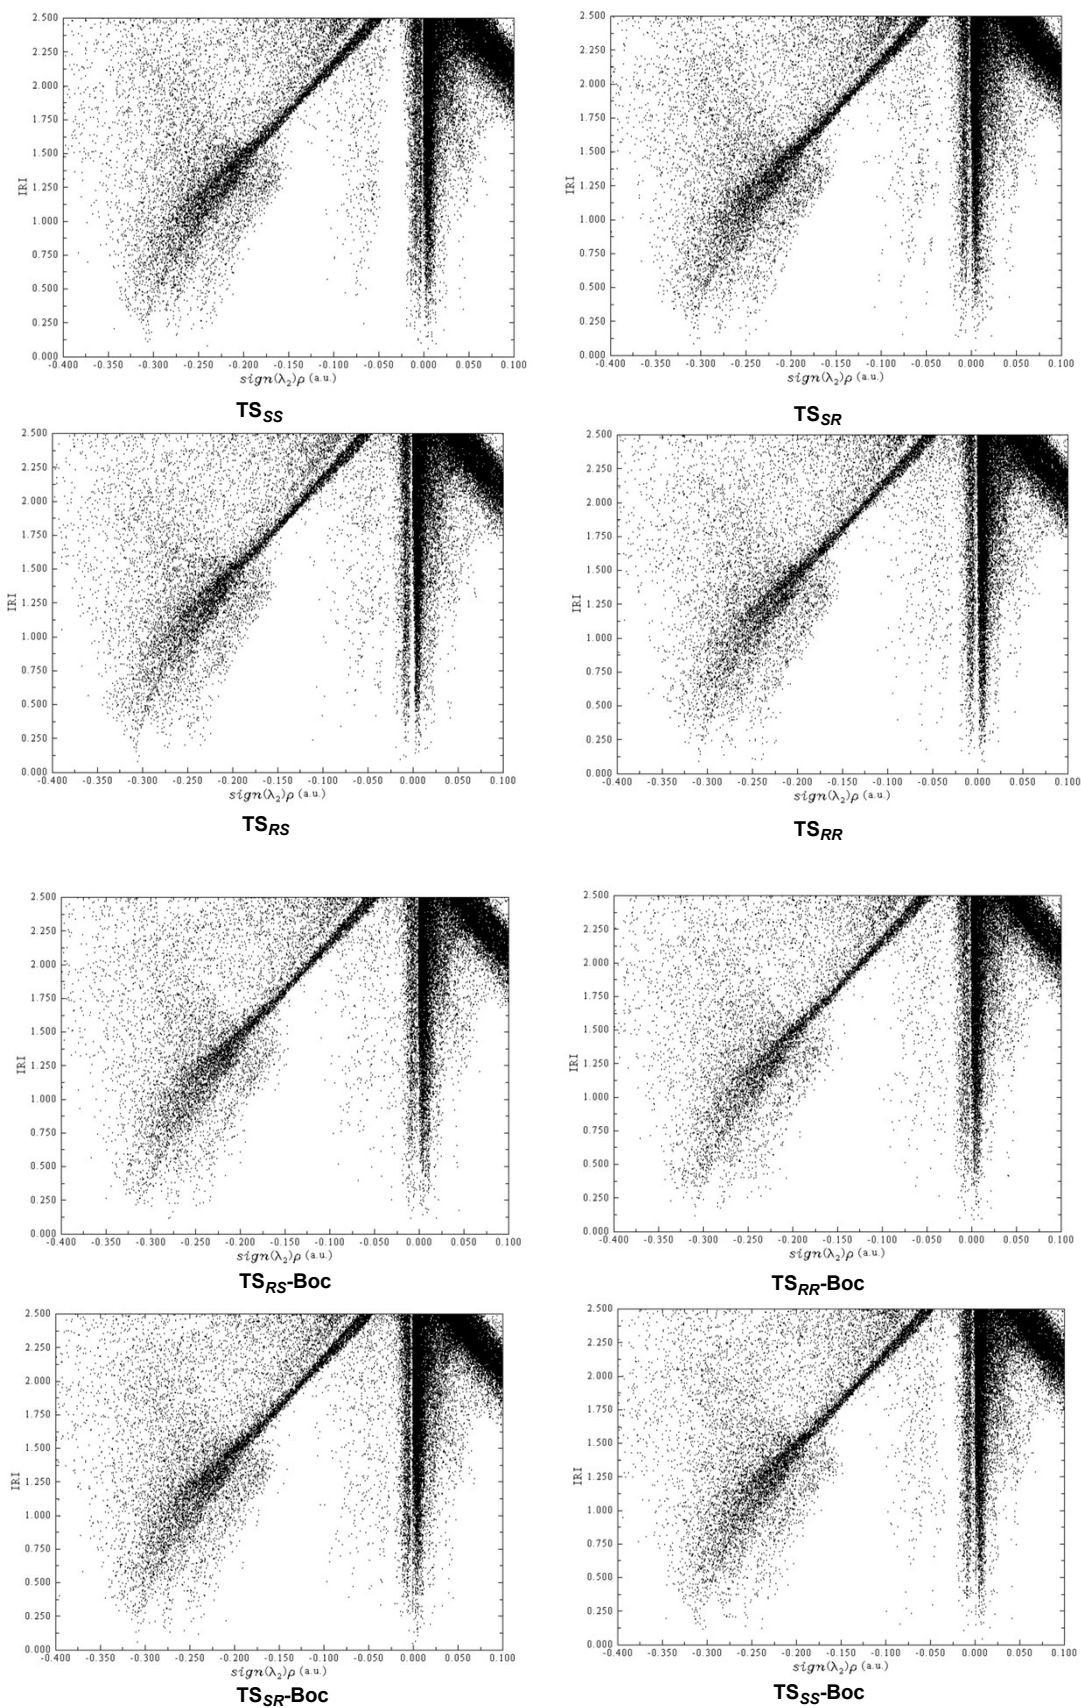

Figure S4. IRI vs  $\text{sign}(\lambda_2)\rho$  scatter plots of transition states.

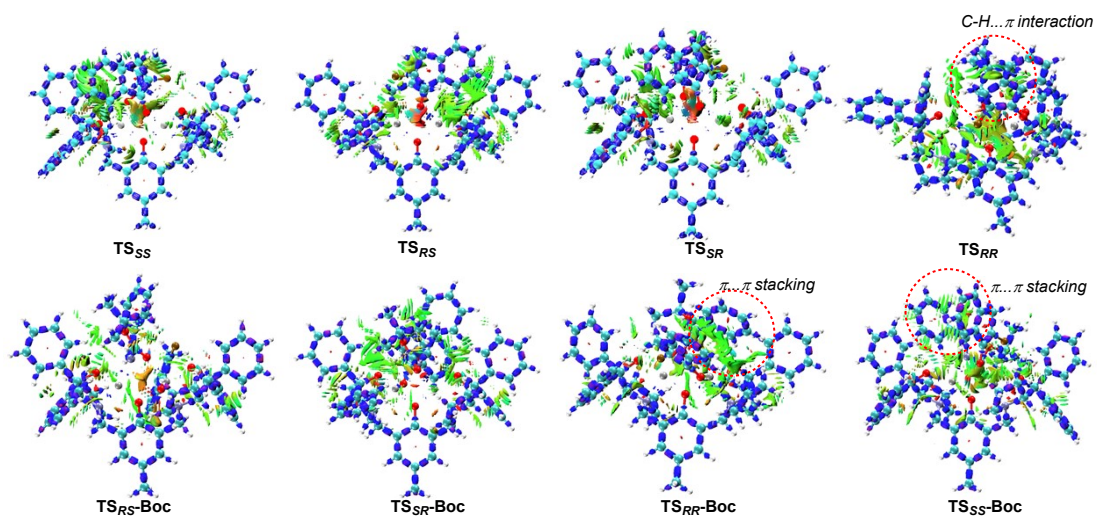

**Figure S5.** IRI analyses of transition states (M06L(D3)/6-311+G(2d,p)/PCM(diethylether) level). The blue, green, and red surfaces indicate strong attraction, weak interaction, and steric effects, respectively.

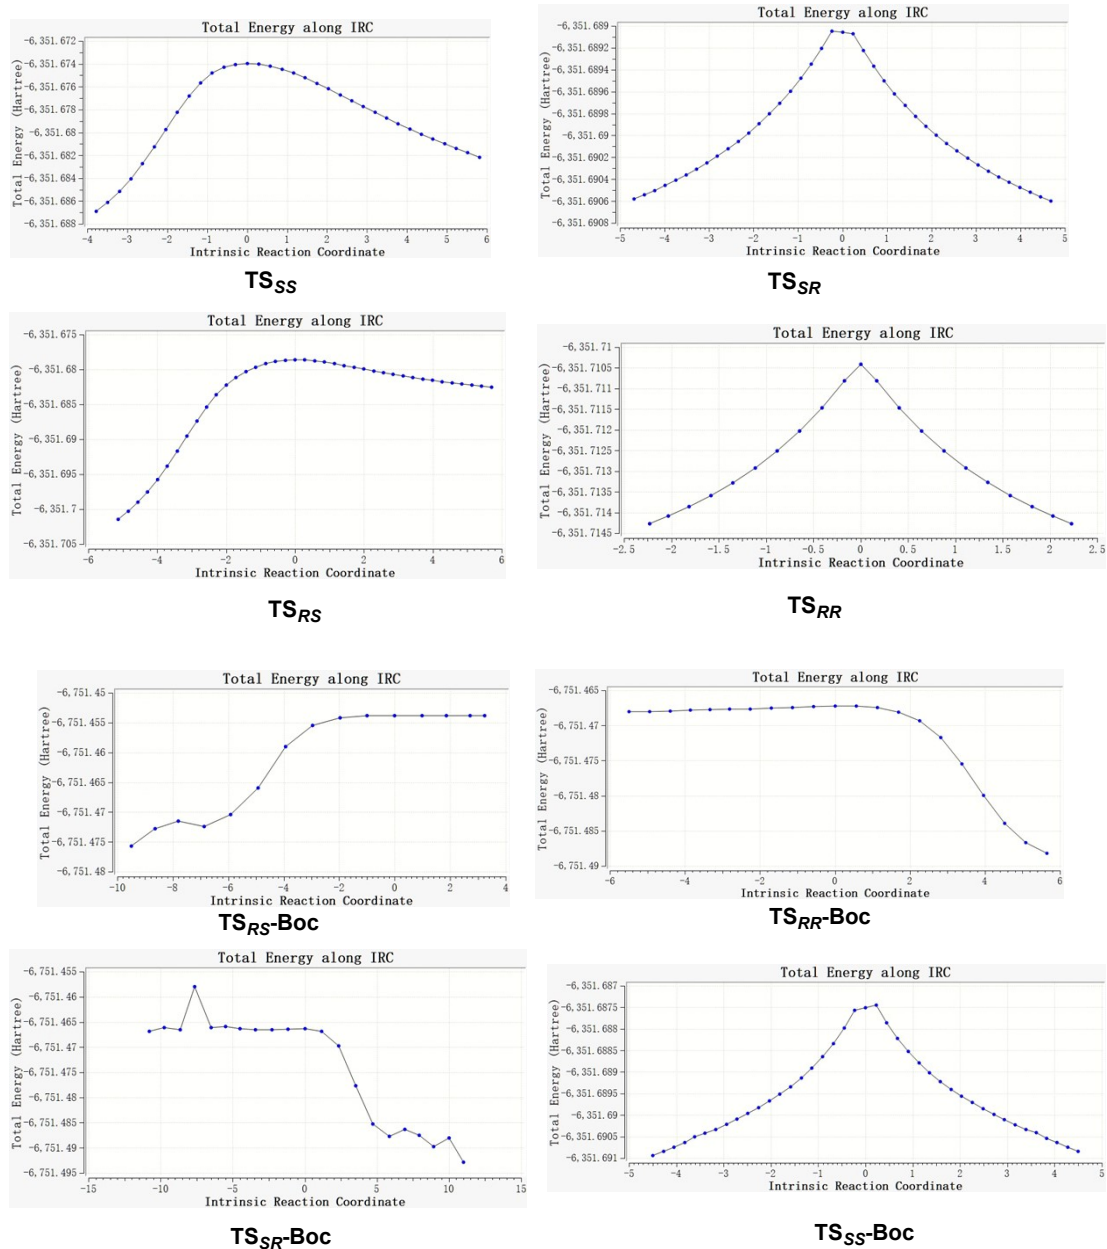

Figure S6. Intrinsic reaction coordinate (IRC) for transition states.

## SAPT results of transition states.

### TS<sub>RS</sub> SAPT Results

---

|                         |                     |                          |                         |
|-------------------------|---------------------|--------------------------|-------------------------|
| Electrostatics          | -353.05480470 [mEh] | -221.54523471 [kcal/mol] | -926.94526203 [kJ/mol]  |
| Elst10,r                | -353.05480470 [mEh] | -221.54523471 [kcal/mol] | -926.94526203 [kJ/mol]  |
| Exchange                | 213.03781471 [mEh]  | 133.68324700 [kcal/mol]  | 559.33070546 [kJ/mol]   |
| Exch10                  | 213.03781471 [mEh]  | 133.68324700 [kcal/mol]  | 559.33070546 [kJ/mol]   |
| Exch10(S <sup>2</sup> ) | 209.74866293 [mEh]  | 131.61927310 [kcal/mol]  | 550.69503867 [kJ/mol]   |
| Induction               | -132.22890520 [mEh] | -82.97489072 [kcal/mol]  | -347.16694278 [kJ/mol]  |
| Ind20,r                 | -480.37943237 [mEh] | -301.44264482 [kcal/mol] | -1261.23602593 [kJ/mol] |
| Exch-Ind20,r            | 354.64456106 [mEh]  | 222.54282189 [kcal/mol]  | 931.11916678 [kJ/mol]   |
| delta HF,r (2)          | -6.49403389 [mEh]   | -4.07506779 [kcal/mol]   | -17.05008363 [kJ/mol]   |
| Dispersion              | -59.51542343 [mEh]  | -37.34649204 [kcal/mol]  | -156.25772268 [kJ/mol]  |
| Disp20                  | -73.59468203 [mEh]  | -46.18136019 [kcal/mol]  | -193.22281105 [kJ/mol]  |
| Exch-Disp20             | 14.07925860 [mEh]   | 8.83486816 [kcal/mol]    | 36.96508837 [kJ/mol]    |
| Disp20 (SS)             | -36.79734102 [mEh]  | -23.09068010 [kcal/mol]  | -96.61140553 [kJ/mol]   |
| Disp20 (OS)             | -36.79734102 [mEh]  | -23.09068010 [kcal/mol]  | -96.61140553 [kJ/mol]   |
| Exch-Disp20 (SS)        | 7.01326003 [mEh]    | 4.40088711 [kcal/mol]    | 18.41331166 [kJ/mol]    |
| Exch-Disp20 (OS)        | 7.06599858 [mEh]    | 4.43398105 [kcal/mol]    | 18.55177671 [kJ/mol]    |
| Total HF                | -272.24589519 [mEh] | -170.83687843 [kcal/mol] | -714.78149935 [kJ/mol]  |
| Total SAPT0             | -331.76131862 [mEh] | -208.18337047 [kcal/mol] | -871.03922203 [kJ/mol]  |

Special recipe for scaled SAPT0 (see Manual):

|                       |                     |                          |                        |
|-----------------------|---------------------|--------------------------|------------------------|
| Electrostatics sSAPT0 | -353.05480470 [mEh] | -221.54523471 [kcal/mol] | -926.94526203 [kJ/mol] |
| Exchange sSAPT0       | 213.03781471 [mEh]  | 133.68324700 [kcal/mol]  | 559.33070546 [kJ/mol]  |
| Induction sSAPT0      | -115.28194472 [mEh] | -72.34051247 [kcal/mol]  | -302.67270417 [kJ/mol] |
| Dispersion sSAPT0     | -58.84263533 [mEh]  | -36.92431113 [kcal/mol]  | -154.49131778 [kJ/mol] |
| Total sSAPT0          | -314.14157004 [mEh] | -197.12681131 [kcal/mol] | -824.77857852 [kJ/mol] |

### TS<sub>SS</sub> SAPT Results

---

|                         |                     |                          |                        |
|-------------------------|---------------------|--------------------------|------------------------|
| Electrostatics          | -372.24417296 [mEh] | -233.58674509 [kcal/mol] | -977.32694147 [kJ/mol] |
| Elst10,r                | -372.24417296 [mEh] | -233.58674509 [kcal/mol] | -977.32694147 [kJ/mol] |
| Exchange                | 222.73773134 [mEh]  | 139.77003658 [kcal/mol]  | 584.79783306 [kJ/mol]  |
| Exch10                  | 222.73773134 [mEh]  | 139.77003658 [kcal/mol]  | 584.79783306 [kJ/mol]  |
| Exch10(S <sup>2</sup> ) | 218.70914583 [mEh]  | 137.24206101 [kcal/mol]  | 574.22078326 [kJ/mol]  |
| Induction               | -123.99323520 [mEh] | -77.80692977 [kcal/mol]  | -325.54419417 [kJ/mol] |



|                                               |                     |                          |                         |
|-----------------------------------------------|---------------------|--------------------------|-------------------------|
| Ind20,r                                       | -571.10271285 [mEh] | -358.37236281 [kcal/mol] | -1499.42996600 [kJ/mol] |
| Exch-Ind20,r                                  | 442.13663670 [mEh]  | 277.44492824 [kcal/mol]  | 1160.82957974 [kJ/mol]  |
| delta HF,r (2)                                | 4.97284094 [mEh]    | 3.12050480 [kcal/mol]    | 13.05619209 [kJ/mol]    |
| Dispersion                                    | -53.48924001 [mEh]  | -33.56500485 [kcal/mol]  | -140.43598029 [kJ/mol]  |
| Disp20                                        | -67.26730573 [mEh]  | -42.21087162 [kcal/mol]  | -176.61028687 [kJ/mol]  |
| Exch-Disp20                                   | 13.77806572 [mEh]   | 8.64586677 [kcal/mol]    | 36.17430657 [kJ/mol]    |
| Disp20 (SS)                                   | -33.63365287 [mEh]  | -21.10543581 [kcal/mol]  | -88.30514343 [kJ/mol]   |
| Disp20 (OS)                                   | -33.63365287 [mEh]  | -21.10543581 [kcal/mol]  | -88.30514343 [kJ/mol]   |
| Exch-Disp20 (SS)                              | 6.60542991 [mEh]    | 4.14496985 [kcal/mol]    | 17.34255384 [kJ/mol]    |
| Exch-Disp20 (OS)                              | 7.17263581 [mEh]    | 4.50089692 [kcal/mol]    | 18.83175273 [kJ/mol]    |
| Total HF                                      | -273.49967683 [mEh] | -171.62363828 [kcal/mol] | -718.07330258 [kJ/mol]  |
| Total SAPT0                                   | -326.98891684 [mEh] | -205.18864313 [kcal/mol] | -858.50928288 [kJ/mol]  |
| Special recipe for scaled SAPT0 (see Manual): |                     |                          |                         |
| Electrostatics sSAPT0                         | -372.24417296 [mEh] | -233.58674509 [kcal/mol] | -977.32694147 [kJ/mol]  |
| Exchange sSAPT0                               | 222.73773134 [mEh]  | 139.77003658 [kcal/mol]  | 584.79783306 [kJ/mol]   |
| Induction sSAPT0                              | -99.10818772 [mEh]  | -62.19132673 [kcal/mol]  | -260.20851102 [kJ/mol]  |
| Dispersion sSAPT0                             | -52.71376069 [mEh]  | -33.07838423 [kcal/mol]  | -138.39995961 [kJ/mol]  |
| Total sSAPT0                                  | -301.32839003 [mEh] | -189.08641946 [kcal/mol] | -791.13757904 [kJ/mol]  |

---

#### TS<sub>SR</sub> SAPT Results

---

|                         |                     |                          |                         |
|-------------------------|---------------------|--------------------------|-------------------------|
| Electrostatics          | -377.06235702 [mEh] | -236.61020123 [kcal/mol] | -989.97708196 [kJ/mol]  |
| Elst10,r                | -377.06235702 [mEh] | -236.61020123 [kcal/mol] | -989.97708196 [kJ/mol]  |
| Exchange                | 213.28844615 [mEh]  | 133.84052061 [kcal/mol]  | 559.98873823 [kJ/mol]   |
| Exch10                  | 213.28844615 [mEh]  | 133.84052061 [kcal/mol]  | 559.98873823 [kJ/mol]   |
| Exch10(S <sup>2</sup> ) | 209.26534971 [mEh]  | 131.31598947 [kcal/mol]  | 549.42609996 [kJ/mol]   |
| Induction               | -129.13217007 [mEh] | -81.03166009 [kcal/mol]  | -339.03646582 [kJ/mol]  |
| Ind20,r                 | -540.86224806 [mEh] | -339.39618467 [kcal/mol] | -1420.03363665 [kJ/mol] |
| Exch-Ind20,r            | 411.55756465 [mEh]  | 258.25627082 [kcal/mol]  | 1080.54423712 [kJ/mol]  |
| delta HF,r (2)          | 0.17251334 [mEh]    | 0.10825376 [kcal/mol]    | 0.45293371 [kJ/mol]     |
| Dispersion              | -51.37006397 [mEh]  | -32.23520181 [kcal/mol]  | -134.87208438 [kJ/mol]  |
| Disp20                  | -64.40049215 [mEh]  | -40.41191894 [kcal/mol]  | -169.08346885 [kJ/mol]  |
| Exch-Disp20             | 13.03042818 [mEh]   | 8.17671713 [kcal/mol]    | 34.21138447 [kJ/mol]    |
| Disp20 (SS)             | -32.20024608 [mEh]  | -20.20595947 [kcal/mol]  | -84.54173443 [kJ/mol]   |
| Disp20 (OS)             | -32.20024608 [mEh]  | -20.20595947 [kcal/mol]  | -84.54173443 [kJ/mol]   |
| Exch-Disp20 (SS)        | 6.25609618 [mEh]    | 3.92575962 [kcal/mol]    | 16.42537826 [kJ/mol]    |
| Exch-Disp20 (OS)        | 6.77433200 [mEh]    | 4.25095751 [kcal/mol]    | 17.78600621 [kJ/mol]    |

|             |                     |                          |                        |
|-------------|---------------------|--------------------------|------------------------|
| Total HF    | -292.90608093 [mEh] | -183.80134071 [kcal/mol] | -769.02480954 [kJ/mol] |
| Total SAPT0 | -344.27614491 [mEh] | -216.03654253 [kcal/mol] | -903.89689393 [kJ/mol] |

Special recipe for scaled SAPT0 (see Manual):

|                       |                     |                          |                        |
|-----------------------|---------------------|--------------------------|------------------------|
| Electrostatics sSAPT0 | -377.06235702 [mEh] | -236.61020123 [kcal/mol] | -989.97708196 [kJ/mol] |
| Exchange sSAPT0       | 213.28844615 [mEh]  | 133.84052061 [kcal/mol]  | 559.98873823 [kJ/mol]  |
| Induction sSAPT0      | -104.93651064 [mEh] | -65.84865457 [kcal/mol]  | -275.51077073 [kJ/mol] |
| Dispersion sSAPT0     | -50.60399908 [mEh]  | -31.75448883 [kcal/mol]  | -132.86078128 [kJ/mol] |
| Total sSAPT0          | -319.31442058 [mEh] | -200.37282403 [kcal/mol] | -838.35989574 [kJ/mol] |

#### TS<sub>RR</sub> SAPT Results

|                         |                     |                          |                         |
|-------------------------|---------------------|--------------------------|-------------------------|
| Electrostatics          | -365.02499848 [mEh] | -229.05664471 [kcal/mol] | -958.37300148 [kJ/mol]  |
| Elst10,r                | -365.02499848 [mEh] | -229.05664471 [kcal/mol] | -958.37300148 [kJ/mol]  |
| Exchange                | 221.11643406 [mEh]  | 138.75265718 [kcal/mol]  | 580.54111766 [kJ/mol]   |
| Exch10                  | 221.11643406 [mEh]  | 138.75265718 [kcal/mol]  | 580.54111766 [kJ/mol]   |
| Exch10(S <sup>2</sup> ) | 217.72389501 [mEh]  | 136.62380679 [kcal/mol]  | 571.63400760 [kJ/mol]   |
| Induction               | -121.29796805 [mEh] | -76.11562410 [kcal/mol]  | -318.46777125 [kJ/mol]  |
| Ind20,r                 | -509.44163696 [mEh] | -319.67945353 [kcal/mol] | -1337.53883356 [kJ/mol] |
| Exch-Ind20,r            | 388.68945035 [mEh]  | 243.90631245 [kcal/mol]  | 1020.50401131 [kJ/mol]  |
| delta HF,r (2)          | -0.54578145 [mEh]   | -0.34248303 [kcal/mol]   | -1.43294899 [kJ/mol]    |
| Dispersion              | -53.05507894 [mEh]  | -33.29256466 [kcal/mol]  | -139.29609055 [kJ/mol]  |
| Disp20                  | -67.52137875 [mEh]  | -42.37030485 [kcal/mol]  | -177.27735548 [kJ/mol]  |
| Exch-Disp20             | 14.46629981 [mEh]   | 9.07774018 [kcal/mol]    | 37.98126492 [kJ/mol]    |
| Disp20 (SS)             | -33.76068937 [mEh]  | -21.18515242 [kcal/mol]  | -88.63867774 [kJ/mol]   |
| Disp20 (OS)             | -33.76068937 [mEh]  | -21.18515242 [kcal/mol]  | -88.63867774 [kJ/mol]   |
| Exch-Disp20 (SS)        | 7.05940485 [mEh]    | 4.42984342 [kcal/mol]    | 18.53446488 [kJ/mol]    |
| Exch-Disp20 (OS)        | 7.40689496 [mEh]    | 4.64789676 [kcal/mol]    | 19.44680004 [kJ/mol]    |
| Total HF                | -265.20653247 [mEh] | -166.41961163 [kcal/mol] | -696.29965508 [kJ/mol]  |
| Total SAPT0             | -318.26161141 [mEh] | -199.71217630 [kcal/mol] | -835.59574563 [kJ/mol]  |

Special recipe for scaled SAPT0 (see Manual):

|                       |                     |                          |                        |
|-----------------------|---------------------|--------------------------|------------------------|
| Electrostatics sSAPT0 | -365.02499848 [mEh] | -229.05664471 [kcal/mol] | -958.37300148 [kJ/mol] |
| Exchange sSAPT0       | 221.11643406 [mEh]  | 138.75265718 [kcal/mol]  | 580.54111766 [kJ/mol]  |
| Induction sSAPT0      | -102.84389214 [mEh] | -64.53551664 [kcal/mol]  | -270.01660162 [kJ/mol] |
| Dispersion sSAPT0     | -52.36825249 [mEh]  | -32.86157456 [kcal/mol]  | -137.49282796 [kJ/mol] |
| Total sSAPT0          | -299.12070905 [mEh] | -187.70107873 [kcal/mol] | -785.34131341 [kJ/mol] |

#### TS<sub>SR</sub>-Boc SAPT Results

|                  |                     |                          |                         |
|------------------|---------------------|--------------------------|-------------------------|
| Electrostatics   | -390.38090958 [mEh] | -244.96771914 [kcal/mol] | -1024.94493690 [kJ/mol] |
| Elst10,r         | -390.38090958 [mEh] | -244.96771914 [kcal/mol] | -1024.94493690 [kJ/mol] |
| Exchange         | 239.92424187 [mEh]  | 150.55473476 [kcal/mol]  | 629.92101025 [kJ/mol]   |
| Exch10           | 239.92424187 [mEh]  | 150.55473476 [kcal/mol]  | 629.92101025 [kJ/mol]   |
| Exch10(S^2)      | 236.15093514 [mEh]  | 148.18694904 [kcal/mol]  | 620.01419478 [kJ/mol]   |
| Induction        | -136.01213461 [mEh] | -85.34890302 [kcal/mol]  | -357.09981022 [kJ/mol]  |
| Ind20,r          | -575.12106671 [mEh] | -360.89391793 [kcal/mol] | -1509.98015263 [kJ/mol] |
| Exch-Ind20,r     | 439.49101585 [mEh]  | 275.78477609 [kcal/mol]  | 1153.88350315 [kJ/mol]  |
| delta HF,r (2)   | -0.38208375 [mEh]   | -0.23976117 [kcal/mol]   | -1.00316074 [kJ/mol]    |
| Dispersion       | -67.81940112 [mEh]  | -42.55731671 [kcal/mol]  | -178.05981312 [kJ/mol]  |
| Disp20           | -83.72356682 [mEh]  | -52.53733136 [kcal/mol]  | -219.81619441 [kJ/mol]  |
| Exch-Disp20      | 15.90416570 [mEh]   | 9.98001465 [kcal/mol]    | 41.75638130 [kJ/mol]    |
| Disp20 (SS)      | -41.86178341 [mEh]  | -26.26866568 [kcal/mol]  | -109.90809721 [kJ/mol]  |
| Disp20 (OS)      | -41.86178341 [mEh]  | -26.26866568 [kcal/mol]  | -109.90809721 [kJ/mol]  |
| Exch-Disp20 (SS) | 7.94983544 [mEh]    | 4.98859706 [kcal/mol]    | 20.87229008 [kJ/mol]    |
| Exch-Disp20 (OS) | 7.95433026 [mEh]    | 4.99141759 [kcal/mol]    | 20.88409121 [kJ/mol]    |
| Total HF         | -286.46880232 [mEh] | -179.76188740 [kcal/mol] | -752.12373687 [kJ/mol]  |
| Total SAPT0      | -354.28820344 [mEh] | -222.31920411 [kcal/mol] | -930.18354999 [kJ/mol]  |

Special recipe for scaled SAPT0 (see Manual):

|                       |                     |                          |                         |
|-----------------------|---------------------|--------------------------|-------------------------|
| Electrostatics sSAPT0 | -390.38090958 [mEh] | -244.96771914 [kcal/mol] | -1024.94493690 [kJ/mol] |
| Exchange sSAPT0       | 239.92424187 [mEh]  | 150.55473476 [kcal/mol]  | 629.92101025 [kJ/mol]   |
| Induction sSAPT0      | -114.60667605 [mEh] | -71.91677498 [kcal/mol]  | -300.89978652 [kJ/mol]  |
| Dispersion sSAPT0     | -67.04478697 [mEh]  | -42.07123899 [kcal/mol]  | -176.02606395 [kJ/mol]  |
| Total sSAPT0          | -332.10813073 [mEh] | -208.40099835 [kcal/mol] | -871.94977711 [kJ/mol]  |

#### TS<sub>SS</sub>-Boc SAPT Results

|                |                     |                          |                         |
|----------------|---------------------|--------------------------|-------------------------|
| Electrostatics | -382.38891304 [mEh] | -239.95266560 [kcal/mol] | -1003.96195287 [kJ/mol] |
| Elst10,r       | -382.38891304 [mEh] | -239.95266560 [kcal/mol] | -1003.96195287 [kJ/mol] |
| Exchange       | 235.79193696 [mEh]  | 147.96167428 [kcal/mol]  | 619.07164520 [kJ/mol]   |
| Exch10         | 235.79193696 [mEh]  | 147.96167428 [kcal/mol]  | 619.07164520 [kJ/mol]   |
| Exch10(S^2)    | 230.72506781 [mEh]  | 144.78216589 [kcal/mol]  | 605.76858208 [kJ/mol]   |
| Induction      | -128.90050272 [mEh] | -80.88628663 [kcal/mol]  | -338.42822326 [kJ/mol]  |
| Ind20,r        | -640.74579727 [mEh] | -402.07405807 [kcal/mol] | -1682.27785897 [kJ/mol] |
| Exch-Ind20,r   | 500.74098276 [mEh]  | 314.21971059 [kcal/mol]  | 1314.69526912 [kJ/mol]  |
| delta HF,r (2) | 11.10431179 [mEh]   | 6.96806085 [kcal/mol]    | 29.15436659 [kJ/mol]    |

|                  |                     |                          |                        |
|------------------|---------------------|--------------------------|------------------------|
| Dispersion       | -59.77677555 [mEh]  | -37.51049297 [kcal/mol]  | -156.94390259 [kJ/mol] |
| Disp20           | -74.36289295 [mEh]  | -46.66341982 [kcal/mol]  | -195.23974854 [kJ/mol] |
| Exch-Disp20      | 14.58611740 [mEh]   | 9.15292685 [kcal/mol]    | 38.29584595 [kJ/mol]   |
| Disp20 (SS)      | -37.18144647 [mEh]  | -23.33170991 [kcal/mol]  | -97.61987427 [kJ/mol]  |
| Disp20 (OS)      | -37.18144647 [mEh]  | -23.33170991 [kcal/mol]  | -97.61987427 [kJ/mol]  |
| Exch-Disp20 (SS) | 7.05402031 [mEh]    | 4.42646457 [kcal/mol]    | 18.52032777 [kJ/mol]   |
| Exch-Disp20 (OS) | 7.53209709 [mEh]    | 4.72646228 [kcal/mol]    | 19.77551818 [kJ/mol]   |
| Total HF         | -275.49747880 [mEh] | -172.87727795 [kcal/mol] | -723.31853093 [kJ/mol] |
| Total SAPT0      | -335.27425435 [mEh] | -210.38777092 [kcal/mol] | -880.26243352 [kJ/mol] |

Special recipe for scaled SAPT0 (see Manual):

|                       |                     |                          |                         |
|-----------------------|---------------------|--------------------------|-------------------------|
| Electrostatics sSAPT0 | -382.38891304 [mEh] | -239.95266560 [kcal/mol] | -1003.96195287 [kJ/mol] |
| Exchange sSAPT0       | 235.79193696 [mEh]  | 147.96167428 [kcal/mol]  | 619.07164520 [kJ/mol]   |
| Induction sSAPT0      | -95.18095223 [mEh]  | -59.72694925 [kcal/mol]  | -249.89755565 [kJ/mol]  |
| Dispersion sSAPT0     | -58.79455652 [mEh]  | -36.89414122 [kcal/mol]  | -154.36508688 [kJ/mol]  |
| Total sSAPT0          | -300.57248483 [mEh] | -188.61208179 [kcal/mol] | -789.15295021 [kJ/mol]  |

#### TS<sub>RS</sub>-Boc SAPT Results

|                         |                     |                          |                         |
|-------------------------|---------------------|--------------------------|-------------------------|
| Electrostatics          | -399.09198745 [mEh] | -250.43400304 [kcal/mol] | -1047.81586870 [kJ/mol] |
| Elst10,r                | -399.09198745 [mEh] | -250.43400304 [kcal/mol] | -1047.81586870 [kJ/mol] |
| Exchange                | 255.51593510 [mEh]  | 160.33866998 [kcal/mol]  | 670.85699519 [kJ/mol]   |
| Exch10                  | 255.51593510 [mEh]  | 160.33866998 [kcal/mol]  | 670.85699519 [kJ/mol]   |
| Exch10(S <sup>2</sup> ) | 249.48159607 [mEh]  | 156.55206507 [kcal/mol]  | 655.01384024 [kJ/mol]   |
| Induction               | -150.00345563 [mEh] | -94.12858951 [kcal/mol]  | -393.83401851 [kJ/mol]  |
| Ind20,r                 | -622.91803864 [mEh] | -390.88697063 [kcal/mol] | -1635.47108512 [kJ/mol] |
| Exch-Ind20,r            | 475.69017968 [mEh]  | 298.50009433 [kcal/mol]  | 1248.92439469 [kJ/mol]  |
| delta HF,r (2)          | -2.77559668 [mEh]   | -1.74171321 [kcal/mol]   | -7.28732807 [kJ/mol]    |
| Dispersion              | -67.78035203 [mEh]  | -42.53281303 [kcal/mol]  | -177.95728973 [kJ/mol]  |
| Disp20                  | -84.77157995 [mEh]  | -53.19496952 [kcal/mol]  | -222.56775249 [kJ/mol]  |
| Exch-Disp20             | 16.99122792 [mEh]   | 10.66215649 [kcal/mol]   | 44.61046276 [kJ/mol]    |
| Disp20 (SS)             | -42.38578997 [mEh]  | -26.59748476 [kcal/mol]  | -111.28387624 [kJ/mol]  |
| Disp20 (OS)             | -42.38578997 [mEh]  | -26.59748476 [kcal/mol]  | -111.28387624 [kJ/mol]  |
| Exch-Disp20 (SS)        | 8.28815701 [mEh]    | 5.20089705 [kcal/mol]    | 21.76055324 [kJ/mol]    |
| Exch-Disp20 (OS)        | 8.70307091 [mEh]    | 5.46125944 [kcal/mol]    | 22.84990952 [kJ/mol]    |
| Total HF                | -293.57950798 [mEh] | -184.22392257 [kcal/mol] | -770.79289202 [kJ/mol]  |
| Total SAPT0             | -361.35986001 [mEh] | -226.75673560 [kcal/mol] | -948.75018175 [kJ/mol]  |

Special recipe for scaled SAPT0 (see Manual):

|                       |                     |                          |                         |
|-----------------------|---------------------|--------------------------|-------------------------|
| Electrostatics sSAPT0 | -399.09198745 [mEh] | -250.43400304 [kcal/mol] | -1047.81586870 [kJ/mol] |
| Exchange sSAPT0       | 255.51593510 [mEh]  | 160.33866998 [kcal/mol]  | 670.85699519 [kJ/mol]   |
| Induction sSAPT0      | -114.64455170 [mEh] | -71.94054231 [kcal/mol]  | -300.99922901 [kJ/mol]  |
| Dispersion sSAPT0     | -66.51736359 [mEh]  | -41.74027582 [kcal/mol]  | -174.64131405 [kJ/mol]  |
| Total sSAPT0          | -324.73796764 [mEh] | -203.77615119 [kcal/mol] | -852.59941657 [kJ/mol]  |

-----

**TS<sub>RR</sub>-Boc SAPT Results**

-----

|                  |                     |                          |                         |
|------------------|---------------------|--------------------------|-------------------------|
| Electrostatics   | -385.14012955 [mEh] | -241.67908002 [kcal/mol] | -1011.18527081 [kJ/mol] |
| Elst10,r         | -385.14012955 [mEh] | -241.67908002 [kcal/mol] | -1011.18527081 [kJ/mol] |
| Exchange         | 241.94976904 [mEh]  | 151.82577225 [kcal/mol]  | 635.23903109 [kJ/mol]   |
| Exch10           | 241.94976904 [mEh]  | 151.82577225 [kcal/mol]  | 635.23903109 [kJ/mol]   |
| Exch10(S^2)      | 238.30671918 [mEh]  | 149.53972395 [kcal/mol]  | 625.67420501 [kJ/mol]   |
| Induction        | -136.04874144 [mEh] | -85.37187415 [kcal/mol]  | -357.19592144 [kJ/mol]  |
| Ind20,r          | -543.53955587 [mEh] | -341.07622068 [kcal/mol] | -1427.06290732 [kJ/mol] |
| Exch-Ind20,r     | 412.30217003 [mEh]  | 258.72351775 [kcal/mol]  | 1082.49919827 [kJ/mol]  |
| delta HF,r (2)   | -4.81135560 [mEh]   | -3.01917122 [kcal/mol]   | -12.63221238 [kJ/mol]   |
| Dispersion       | -62.27738157 [mEh]  | -39.07964694 [kcal/mol]  | -163.50924279 [kJ/mol]  |
| Disp20           | -77.26179139 [mEh]  | -48.48250606 [kcal/mol]  | -202.85080536 [kJ/mol]  |
| Exch-Disp20      | 14.98440982 [mEh]   | 9.40285912 [kcal/mol]    | 39.34156257 [kJ/mol]    |
| Disp20 (SS)      | -38.63089570 [mEh]  | -24.24125303 [kcal/mol]  | -101.42540268 [kJ/mol]  |
| Disp20 (OS)      | -38.63089570 [mEh]  | -24.24125303 [kcal/mol]  | -101.42540268 [kJ/mol]  |
| Exch-Disp20 (SS) | 7.31513517 [mEh]    | 4.59031662 [kcal/mol]    | 19.20588473 [kJ/mol]    |
| Exch-Disp20 (OS) | 7.66927466 [mEh]    | 4.81254251 [kcal/mol]    | 20.13567784 [kJ/mol]    |
| Total HF         | -279.23910195 [mEh] | -175.22518192 [kcal/mol] | -733.14216117 [kJ/mol]  |
| Total SAPT0      | -341.51648352 [mEh] | -214.30482886 [kcal/mol] | -896.65140395 [kJ/mol]  |

Special recipe for scaled SAPT0 (see Manual):

|                       |                     |                          |                         |
|-----------------------|---------------------|--------------------------|-------------------------|
| Electrostatics sSAPT0 | -385.14012955 [mEh] | -241.67908002 [kcal/mol] | -1011.18527081 [kJ/mol] |
| Exchange sSAPT0       | 241.94976904 [mEh]  | 151.82577225 [kcal/mol]  | 635.23903109 [kJ/mol]   |
| Induction sSAPT0      | -116.84932861 [mEh] | -73.32406071 [kcal/mol]  | -306.78786999 [kJ/mol]  |
| Dispersion sSAPT0     | -61.57961209 [mEh]  | -38.64178998 [kcal/mol]  | -161.67724927 [kJ/mol]  |
| Total sSAPT0          | -321.61930121 [mEh] | -201.81915846 [kcal/mol] | -844.41135899 [kJ/mol]  |

-----

## Cartesian coordinates of transition states.

|                                      |             |             |             |                                      |             |             |             |
|--------------------------------------|-------------|-------------|-------------|--------------------------------------|-------------|-------------|-------------|
| <b>Int<sub>RS</sub></b>              |             |             |             | C                                    | 1.97074700  | 1.27939200  | -3.84430700 |
| G <sub>gas</sub> = -6350.754978 a.u. |             |             |             | H                                    | 1.18397100  | 0.51654600  | -3.80417700 |
| E <sub>solv</sub> = -6352.12865 a.u. |             |             |             | H                                    | 1.98951600  | 1.68582000  | -4.85958700 |
| Zn                                   | -1.53612000 | 0.08123400  | 0.39663900  | C                                    | 3.32321600  | 0.68000300  | -3.39840500 |
| Zn                                   | 1.13916700  | 0.09403800  | -0.80477600 | H                                    | 3.31609400  | -0.40895800 | -3.46872400 |
| O                                    | -0.40924100 | 1.40073200  | -0.57511400 | H                                    | 4.15226300  | 1.03903000  | -4.01396300 |
| O                                    | -2.95960400 | -1.02841000 | -0.11978600 | C                                    | 3.52703700  | 1.12770200  | -1.92373000 |
| O                                    | 2.75074300  | -0.88463500 | -0.84673700 | H                                    | 4.30251900  | 1.90313900  | -1.87830500 |
| N                                    | -2.84538500 | 1.45469600  | 1.19738200  | C                                    | 3.87673000  | -0.08415300 | -0.97670600 |
| N                                    | 2.21499700  | 1.74187400  | -1.55778400 | C                                    | 5.02576400  | -0.88752800 | -1.63102200 |
| C                                    | -0.31739400 | 2.67420100  | -0.13542600 | C                                    | 6.24398000  | -0.29305800 | -1.98712100 |
| C                                    | 0.91716600  | 3.36164100  | -0.12259500 | H                                    | 6.41427300  | 0.76080000  | -1.78700400 |
| C                                    | 0.95280400  | 4.69689600  | 0.28758800  | C                                    | 7.25641000  | -1.04044300 | -2.58826300 |
| H                                    | 1.91201200  | 5.21259600  | 0.28681000  | H                                    | 8.19242100  | -0.55851200 | -2.86008400 |
| C                                    | -0.18377400 | 5.38426000  | 0.71910200  | C                                    | 7.07191100  | -2.40296300 | -2.83475200 |
| C                                    | -1.38872400 | 4.67736900  | 0.73416700  | H                                    | 7.86162100  | -2.98747000 | -3.29980800 |
| H                                    | -2.29413600 | 5.17517500  | 1.07826200  | C                                    | 5.86633600  | -3.00521100 | -2.47340100 |
| C                                    | -1.47737200 | 3.35198200  | 0.30776000  | H                                    | 5.71247300  | -4.06634700 | -2.65570600 |
| C                                    | -0.11743400 | 6.83613900  | 1.13099300  | C                                    | 4.85184900  | -2.25190300 | -1.87882600 |
| H                                    | 0.86566000  | 7.09253600  | 1.54152000  | H                                    | 3.90830400  | -2.70382600 | -1.59622700 |
| H                                    | -0.29842700 | 7.50662300  | 0.27958500  | C                                    | 4.39816100  | 0.35197200  | 0.41835600  |
| H                                    | -0.86964400 | 7.07141300  | 1.89247500  | C                                    | 5.19528400  | 1.48265300  | 0.64752300  |
| C                                    | -2.81113200 | 2.64663400  | 0.30228400  | H                                    | 5.43471000  | 2.16115400  | -0.16573200 |
| H                                    | -3.03950300 | 2.30267500  | -0.70527500 | C                                    | 5.68677200  | 1.77119500  | 1.92235400  |
| H                                    | -3.61088800 | 3.33831700  | 0.60487500  | H                                    | 6.29189600  | 2.66147900  | 2.07570000  |
| C                                    | -2.64256100 | 1.80401200  | 2.62371600  | C                                    | 5.40919600  | 0.91861700  | 2.99188400  |
| H                                    | -3.35640900 | 2.59270400  | 2.91262800  | H                                    | 5.80179300  | 1.13553400  | 3.98214000  |
| H                                    | -1.62895800 | 2.17430700  | 2.77287800  | C                                    | 4.62924000  | -0.21897200 | 2.77302200  |
| C                                    | -2.94796700 | 0.48972200  | 3.33370300  | H                                    | 4.40987100  | -0.90193500 | 3.58906400  |
| H                                    | -2.06493000 | -0.16028600 | 3.28440400  | C                                    | 4.12015000  | -0.49005800 | 1.50290000  |
| H                                    | -3.19311700 | 0.63250500  | 4.38983300  | H                                    | 3.50652000  | -1.36599100 | 1.33065400  |
| C                                    | -4.11306800 | -0.10641100 | 2.50963100  | O                                    | -0.09277100 | -1.20337400 | -1.94102400 |
| H                                    | -3.96734500 | -1.17340400 | 2.33138500  | C                                    | 0.09677600  | -2.37739300 | -1.61601600 |
| H                                    | -5.07284500 | 0.01485600  | 3.01800500  | C                                    | -0.83275600 | -3.50687900 | -1.94654000 |
| C                                    | -4.12186100 | 0.66062000  | 1.15736000  | C                                    | -1.40211800 | -3.98232700 | -0.58136200 |
| H                                    | -4.95732500 | 1.37125300  | 1.11422700  | C                                    | 0.00873400  | -4.63301000 | -2.58744700 |
| C                                    | -4.15865900 | -0.32205200 | -0.08226400 | C                                    | -1.96987500 | -3.05213000 | -2.86642300 |
| C                                    | -5.33658000 | -1.30746100 | 0.07373200  | H                                    | 0.99335100  | -2.62607800 | -1.02461500 |
| C                                    | -6.57326100 | -0.95353000 | 0.63149400  | H                                    | -2.61212700 | -3.90513600 | -3.11170100 |
| H                                    | -6.73467100 | 0.04646700  | 1.02311500  | H                                    | -1.58246200 | -2.63287700 | -3.80114500 |
| C                                    | -7.61750000 | -1.87684600 | 0.71272600  | H                                    | -2.57442600 | -2.29083900 | -2.37033700 |
| H                                    | -8.56432900 | -1.57853000 | 1.15604400  | H                                    | -0.62328300 | -5.51391300 | -2.74371100 |
| C                                    | -7.44577300 | -3.17551600 | 0.23344800  | H                                    | 0.84714200  | -4.92905700 | -1.94557800 |
| H                                    | -8.25755000 | -3.89550000 | 0.29585900  | H                                    | 0.41149900  | -4.32647900 | -3.55956300 |
| C                                    | -6.21749800 | -3.54004600 | -0.32122300 | H                                    | -2.07598700 | -4.82821600 | -0.76127800 |
| H                                    | -6.06737700 | -4.55032100 | -0.69449400 | H                                    | -1.96396200 | -3.17920400 | -0.09519700 |
| C                                    | -5.17567500 | -2.61613800 | -0.39657600 | H                                    | -0.60889600 | -4.32418500 | 0.09207700  |
| H                                    | -4.21845200 | -2.89974500 | -0.81472300 | C                                    | 0.66397000  | -0.74037600 | 2.09374000  |
| C                                    | -4.37869000 | 0.46441800  | -1.40469100 | C                                    | 0.86776900  | 0.35050300  | 2.86595700  |
| C                                    | -5.52406300 | 1.24247500  | -1.62693300 | C                                    | 1.16766200  | -1.89741900 | 2.84879500  |
| H                                    | -6.31265900 | 1.27333600  | -0.88166600 | C                                    | 1.49265600  | 0.05129400  | 4.19250900  |
| C                                    | -5.67574600 | 1.97910400  | -2.80121000 | C                                    | 1.65301100  | -1.45409300 | 4.09744000  |
| H                                    | -6.57116600 | 2.57803600  | -2.94808400 | H                                    | 0.86084900  | 0.35513400  | 5.03924000  |
| C                                    | -4.68517100 | 1.94659700  | -3.78592000 | H                                    | 2.46113500  | 0.55685200  | 4.30527200  |
| H                                    | -4.80222300 | 2.52201300  | -4.70047300 | F                                    | 0.57516800  | 1.62382300  | 2.49231300  |
| C                                    | -3.54841000 | 1.16480500  | -3.58246600 | C                                    | 2.19751600  | -2.35623900 | 4.99795300  |
| H                                    | -2.76804100 | 1.12614800  | -4.33851400 | C                                    | 1.23471800  | -3.23961300 | 2.48975200  |
| C                                    | -3.39858800 | 0.42964400  | -2.40445500 | C                                    | 2.26326700  | -3.71301800 | 4.64178200  |
| H                                    | -2.50347900 | -0.15807100 | -2.24465100 | C                                    | 1.78946700  | -4.14651700 | 3.40037000  |
| C                                    | 2.23451400  | 2.66880900  | -0.40594200 | H                                    | 2.57445300  | -2.02203900 | 5.96194600  |
| H                                    | 2.53077200  | 2.09190800  | 0.47726800  | H                                    | 2.69118300  | -4.43057700 | 5.33649200  |
| H                                    | 3.01998600  | 3.42611500  | -0.55630200 | H                                    | 1.85441500  | -5.19959100 | 3.13900900  |
| C                                    | 1.68238600  | 2.34819700  | -2.79531600 | H                                    | 0.87084700  | -3.56162900 | 1.51988000  |
| H                                    | 0.62116900  | 2.56876200  | -2.67071800 | O                                    | 0.14214600  | -0.81792000 | 0.86016000  |
| H                                    | 2.21521400  | 3.28847400  | -3.01341800 | <b>TS<sub>RS</sub></b>               |             |             |             |
|                                      |             |             |             | G <sub>gas</sub> = -6350.730024 a.u. |             |             |             |

$E_{\text{solv}} = -6352.11367$  a.u.

|    |             |             |             |
|----|-------------|-------------|-------------|
| Zn | 1.23770300  | 0.31916300  | -0.51871200 |
| Zn | -1.62964900 | 0.16661400  | 0.43000900  |
| O  | -0.35243100 | 1.49864300  | -0.25813700 |
| O  | 2.84742500  | -0.43390600 | 0.08729900  |
| O  | -3.06038100 | -0.98203700 | 0.17823300  |
| N  | 2.40109800  | 2.01760300  | -1.09815900 |
| N  | -3.09596300 | 1.71961100  | 0.78231200  |
| C  | -0.46008200 | 2.84032000  | -0.30462200 |
| C  | -1.72899400 | 3.45056400  | -0.38163200 |
| C  | -1.82480600 | 4.84165100  | -0.44013100 |
| H  | -2.81436700 | 5.29251100  | -0.49471600 |
| C  | -0.69635200 | 5.66638400  | -0.44287800 |
| C  | 0.55164800  | 5.04309800  | -0.35675700 |
| H  | 1.45115600  | 5.65636700  | -0.33801500 |
| C  | 0.69096800  | 3.65584300  | -0.27513500 |
| C  | -0.81861000 | 7.16776900  | -0.55816800 |
| H  | -0.79341000 | 7.49521400  | -1.60656000 |
| H  | -1.76093500 | 7.52746500  | -0.13008300 |
| H  | 0.00108500  | 7.67821800  | -0.04015200 |
| C  | 2.05737900  | 3.04676700  | -0.08488100 |
| H  | 2.11795100  | 2.57122700  | 0.89755400  |
| H  | 2.82250900  | 3.83769800  | -0.09962300 |
| C  | 2.25294900  | 2.50531500  | -2.48568700 |
| H  | 2.76831400  | 3.47319600  | -2.60196000 |
| H  | 1.19577900  | 2.65184500  | -2.71808200 |
| C  | 2.92825800  | 1.41092100  | -3.30587000 |
| H  | 2.21473600  | 0.59381200  | -3.46644900 |
| H  | 3.24650800  | 1.76475000  | -4.29049900 |
| C  | 4.10301400  | 0.95119300  | -2.41174100 |
| H  | 4.19705700  | -0.13473000 | -2.38437600 |
| H  | 5.05861500  | 1.34275700  | -2.76994500 |
| C  | 3.80311400  | 1.50604000  | -0.99376400 |
| H  | 4.46109200  | 2.36013000  | -0.78627800 |
| C  | 3.92825400  | 0.42655200  | 0.15525500  |
| C  | 5.23591800  | -0.37601200 | -0.04259400 |
| C  | 6.47369500  | 0.22679400  | -0.30853600 |
| H  | 6.55090000  | 1.30628100  | -0.39844300 |
| C  | 7.62431700  | -0.54288800 | -0.48342600 |
| H  | 8.57198000  | -0.05325500 | -0.69438100 |
| C  | 7.55822300  | -1.93500200 | -0.39419800 |
| H  | 8.45368100  | -2.53584000 | -0.53170600 |
| C  | 6.32970700  | -2.54399500 | -0.13619800 |
| H  | 6.25661600  | -3.62739900 | -0.08084300 |
| C  | 5.18060700  | -1.77106900 | 0.03630200  |
| H  | 4.21819700  | -2.23684200 | 0.20682600  |
| C  | 3.99531100  | 1.11542300  | 1.54904700  |
| C  | 4.87762200  | 2.16243800  | 1.85268400  |
| H  | 5.57355900  | 2.52831200  | 1.10476800  |
| C  | 4.88229100  | 2.75779700  | 3.11476800  |
| H  | 5.57266500  | 3.57196300  | 3.32143900  |
| C  | 4.00643500  | 2.31356800  | 4.10751700  |
| H  | 4.00880100  | 2.77863600  | 5.08983500  |
| C  | 3.13205000  | 1.26459000  | 3.82196200  |
| H  | 2.44707400  | 0.90108400  | 4.58449700  |
| C  | 3.13060800  | 0.67465800  | 2.55720100  |
| H  | 2.44488600  | -0.12643000 | 2.32185200  |
| C  | -2.96465700 | 2.59146200  | -0.41631900 |
| H  | -2.94309500 | 1.94575800  | -1.29595500 |
| H  | -3.86229600 | 3.22207000  | -0.50312400 |
| C  | -3.08075300 | 2.50011300  | 2.03924800  |
| H  | -2.07655700 | 2.88779100  | 2.22583300  |
| H  | -3.76305200 | 3.36121300  | 1.94598900  |
| C  | -3.57791100 | 1.51171700  | 3.09392400  |
| H  | -2.73244900 | 0.95879500  | 3.51611200  |
| H  | -4.07401000 | 2.02396100  | 3.92334400  |
| C  | -4.51949000 | 0.55946200  | 2.31662900  |
| H  | -4.23317400 | -0.48403000 | 2.46408100  |
| H  | -5.56132500 | 0.65874500  | 2.62902000  |

|   |             |             |             |
|---|-------------|-------------|-------------|
| C | -4.36536900 | 0.92687900  | 0.82057600  |
| H | -5.18712200 | 1.58229300  | 0.49996600  |
| C | -4.25977500 | -0.34824100 | -0.09925900 |
| C | -5.41926500 | -1.31870800 | 0.20843200  |
| C | -6.73399400 | -0.89605000 | 0.44466200  |
| H | -6.97770600 | 0.16267400  | 0.45197100  |
| C | -7.75085100 | -1.82020500 | 0.69132100  |
| H | -8.76270600 | -1.46944200 | 0.87954600  |
| C | -7.46889300 | -3.18690300 | 0.70067100  |
| H | -8.25941100 | -3.90807700 | 0.89207900  |
| C | -6.16138000 | -3.61683900 | 0.46525400  |
| H | -5.92943700 | -4.67930600 | 0.47189800  |
| C | -5.14537900 | -2.69177100 | 0.22360600  |
| H | -4.12456600 | -3.01278100 | 0.04967500  |
| C | -4.34889000 | 0.02057800  | -1.60472900 |
| C | -5.40200800 | 0.77572700  | -2.13964000 |
| H | -6.21784400 | 1.10419700  | -1.50245400 |
| C | -5.42346800 | 1.11730900  | -3.49180700 |
| H | -6.24634300 | 1.71007100  | -3.88409600 |
| C | -4.39376900 | 0.70038700  | -4.33913200 |
| H | -4.40832500 | 0.96993400  | -5.39207200 |
| C | -3.35234500 | -0.06967700 | -3.82045400 |
| H | -2.54770400 | -0.40873800 | -4.46831500 |
| C | -3.33247700 | -0.41157000 | -2.46630700 |
| H | -2.51802800 | -1.00036500 | -2.05876600 |
| O | 0.07658900  | -0.61318000 | 1.23439100  |
| C | 0.44053700  | -1.76974200 | 1.63473100  |
| C | -0.23337200 | -2.36542000 | 2.86865800  |
| C | 0.57358800  | -1.71780100 | 4.03383000  |
| C | -0.09977700 | -3.88918700 | 2.96662500  |
| C | -1.70464200 | -1.94544100 | 2.98545800  |
| H | 1.49372200  | -2.02381800 | 1.47275100  |
| H | -2.14325700 | -2.38454000 | 3.88860900  |
| H | -2.28874500 | -2.25066500 | 2.11674000  |
| H | -1.78729200 | -0.85848000 | 3.07592200  |
| H | -0.38500100 | -4.22089000 | 3.97130200  |
| H | 0.93211700  | -4.21625600 | 2.79164000  |
| H | -0.75872200 | -4.38342800 | 2.24964200  |
| H | 0.15906700  | -2.05649200 | 4.99049500  |
| H | 0.50637700  | -0.62559300 | 3.99347000  |
| H | 1.63295100  | -1.99789600 | 4.00310400  |
| C | 0.40263300  | -2.26236000 | -1.08676800 |
| C | -0.17679900 | -3.17485000 | -0.18428100 |
| C | 1.64056600  | -2.89215800 | -1.58163400 |
| C | 0.51532700  | -4.51991000 | -0.26105900 |
| C | 1.73416400  | -4.20405600 | -1.09194900 |
| H | -0.14171300 | -5.24170300 | -0.76827300 |
| H | 0.77404400  | -4.95487300 | 0.70780400  |
| F | -1.50138400 | -3.17370700 | 0.12800700  |
| C | 2.83912300  | -4.99038400 | -1.39829600 |
| C | 2.60573800  | -2.37607200 | -2.44231500 |
| C | 3.82273400  | -4.46472300 | -2.24472300 |
| C | 3.69982400  | -3.17263200 | -2.77330500 |
| H | 2.93063900  | -6.00013600 | -1.00552000 |
| H | 4.68813700  | -5.06895000 | -2.50316000 |
| H | 4.47331000  | -2.78482200 | -3.42990700 |
| H | 2.49756200  | -1.37346300 | -2.83444600 |
| O | 0.02347700  | -1.05903000 | -1.36436500 |

$\text{Int}_{\text{GS}}$

$G_{\text{gas}} = -6350.759101$  a.u.

$E_{\text{solv}} = -6352.132348$  a.u.

|    |             |             |             |
|----|-------------|-------------|-------------|
| Zn | -1.52506100 | 0.22923100  | 0.30412200  |
| Zn | 1.19374700  | -0.57915700 | -0.52983300 |
| O  | -0.30704300 | 0.67117700  | -1.20769100 |
| O  | -3.00658600 | -0.91173600 | 0.45249500  |
| O  | 2.78575400  | -1.38069900 | 0.08964900  |
| N  | -2.76399600 | 1.86783800  | 0.10111300  |
| N  | 2.30244900  | 0.19861300  | -2.13700500 |

|   |             |             |             |                        |                     |             |             |
|---|-------------|-------------|-------------|------------------------|---------------------|-------------|-------------|
| C | -0.13225600 | 1.95068900  | -1.59613000 | C                      | 7.00637900          | -3.99738400 | -0.28565800 |
| C | 1.13993800  | 2.44207500  | -1.97222300 | H                      | 7.76934300          | -4.76728000 | -0.20370300 |
| C | 1.26582700  | 3.77583700  | -2.37461700 | C                      | 5.91799200          | -3.98421500 | 0.58849100  |
| H | 2.25371800  | 4.13801100  | -2.65516200 | H                      | 5.83004400          | -4.74690600 | 1.35878400  |
| C | 0.18700200  | 4.66090700  | -2.40945600 | C                      | 4.93743600          | -2.99777400 | 0.47886300  |
| C | -1.06130700 | 4.16028200  | -2.02841000 | H                      | 4.08352900          | -2.98114700 | 1.14609900  |
| H | -1.92744100 | 4.82007400  | -2.04297800 | C                      | 4.50000300          | 0.33093500  | 0.18203100  |
| C | -1.24137100 | 2.83253800  | -1.64251900 | C                      | 5.52949900          | 1.11979600  | -0.35276700 |
| C | 0.35455800  | 6.09010500  | -2.86929800 | H                      | 5.98760200          | 0.85317600  | -1.30033600 |
| H | 1.37126200  | 6.45410200  | -2.68459800 | C                      | 5.98097100          | 2.25778000  | 0.31512900  |
| H | 0.16325400  | 6.19254100  | -3.94620600 | H                      | 6.77310200          | 2.85986800  | -0.12378400 |
| H | -0.34086500 | 6.76156000  | -2.35294600 | C                      | 5.41642900          | 2.62538000  | 1.53914400  |
| C | -2.62207300 | 2.32178100  | -1.31122500 | H                      | 5.75776800          | 3.51965900  | 2.05421600  |
| H | -2.85273600 | 1.46987700  | -1.94919600 | C                      | 4.41205600          | 1.83266200  | 2.09362500  |
| H | -3.37467800 | 3.09835500  | -1.51113900 | H                      | 3.95627900          | 2.10942300  | 3.03957600  |
| C | -2.59753200 | 2.96887500  | 1.07945200  | C                      | 3.96650500          | 0.69115100  | 1.42363900  |
| H | -3.27103900 | 3.80007700  | 0.81360800  | H                      | 3.18347600          | 0.07151100  | 1.84417200  |
| H | -1.57070400 | 3.33516900  | 1.06595700  | O                      | -0.06721900         | -2.26406500 | -0.74540800 |
| C | -3.01136400 | 2.31452000  | 2.39146000  | C                      | 0.03604700          | -2.99466000 | 0.24399500  |
| H | -2.17153000 | 1.72555900  | 2.78136100  | C                      | -0.95458900         | -4.05157300 | 0.62482900  |
| H | -3.28058800 | 3.04782300  | 3.15641200  | C                      | -1.60181500         | -3.53906900 | 1.94276700  |
| C | -4.18400700 | 1.39370700  | 1.98105300  | C                      | -0.16778200         | -5.35294400 | 0.89803100  |
| H | -4.10688900 | 0.41421200  | 2.45688900  | C                      | -2.02195300         | -4.24726300 | -0.45607900 |
| H | -5.15062700 | 1.82082000  | 2.25963700  | H                      | 0.89561000          | -2.85888800 | 0.91977700  |
| C | -4.09189300 | 1.24098600  | 0.43706200  | H                      | -2.71837100         | -5.03567000 | -0.14978600 |
| H | -4.87272000 | 1.82816100  | -0.06310300 | H                      | -1.57341200         | -4.53752700 | -1.41250000 |
| C | -4.15157300 | -0.27269800 | -0.01343200 | H                      | -2.58555800         | -3.32396700 | -0.60340900 |
| C | -5.40378400 | -0.94399200 | 0.58931400  | H                      | -0.85505200         | -6.11862800 | 1.27376100  |
| C | -6.63097400 | -0.28615600 | 0.75241900  | H                      | 0.61402600          | -5.20182900 | 1.65156900  |
| H | -6.73319000 | 0.76315100  | 0.49096200  | H                      | 0.30271400          | -5.73622700 | -0.01482400 |
| C | -7.74324300 | -0.95451100 | 1.26801700  | H                      | -2.26731100         | -4.32087000 | 2.32794500  |
| H | -8.68152100 | -0.41923000 | 1.39102500  | H                      | -2.18760300         | -2.63491200 | 1.75337800  |
| C | -7.65008600 | -2.29884900 | 1.62829700  | H                      | -0.85071700         | -3.31595100 | 2.70543000  |
| H | -8.51473600 | -2.82065400 | 2.02995900  | C                      | 0.52544600          | 0.19678300  | 2.41662600  |
| C | -6.43219900 | -2.96337000 | 1.47172600  | C                      | 0.74750000          | -0.45980800 | 3.57674600  |
| H | -6.34348200 | -4.01022700 | 1.75214900  | C                      | 0.87712500          | 1.60706900  | 2.64084400  |
| C | -5.32245900 | -2.29139200 | 0.96028700  | C                      | 1.22330300          | 0.43485800  | 4.68575700  |
| H | -4.37419900 | -2.80166000 | 0.84915800  | C                      | 1.27410700          | 1.77809900  | 3.98235800  |
| C | -4.25918500 | -0.39104600 | -1.55948300 | H                      | 2.21155200          | 0.13573400  | 5.06271000  |
| C | -5.32349000 | 0.17252100  | -2.27775300 | H                      | 0.53930100          | 0.43214700  | 5.54619500  |
| H | -6.12898300 | 0.67386600  | -1.75015600 | C                      | 1.66958200          | 3.02572800  | 4.43966400  |
| C | -5.37104300 | 0.09478100  | -3.66924700 | C                      | 0.90099300          | 2.66879700  | 1.74170400  |
| H | -6.20427700 | 0.54312400  | -4.20476100 | C                      | 1.67792600          | 4.10651100  | 3.54090800  |
| C | -4.35551100 | -0.55770900 | -4.37320800 | C                      | 1.30520100          | 3.92607400  | 2.20623800  |
| H | -4.39118700 | -0.61633600 | -5.45787700 | H                      | 1.97921100          | 3.16862600  | 5.47243300  |
| C | -3.30056500 | -1.13624700 | -3.66787900 | H                      | 1.99045000          | 5.08819900  | 3.88613900  |
| H | -2.50338600 | -1.65073300 | -4.19886300 | H                      | 1.33906300          | 4.76379600  | 1.51480500  |
| C | -3.25555400 | -1.05648100 | -2.27429800 | H                      | 0.63609400          | 2.51910500  | 0.70079900  |
| H | -2.42395300 | -1.49069400 | -1.73356200 | O                      | 0.09869100          | -0.28871300 | 1.24427500  |
| C | 2.41678500  | 1.63669400  | -1.81968300 | F                      | 0.58308100          | -1.78518300 | 3.77840300  |
| H | 2.76232700  | 1.71396400  | -0.78411600 |                        |                     |             |             |
| H | 3.20781700  | 2.08794900  | -2.43920700 | <b>TS<sub>SS</sub></b> |                     |             |             |
| C | 1.74964400  | -0.07226600 | -3.47983800 | G <sub>gas</sub>       | = -6350.72766 a.u.  |             |             |
| H | 0.70495600  | 0.24011200  | -3.51763500 | E <sub>solv</sub>      | = -6352.099668 a.u. |             |             |
| H | 2.31688300  | 0.49077000  | -4.23929800 | Zn                     | 1.67963900          | 0.24674900  | -0.82792500 |
| C | 1.94637000  | -1.57871300 | -3.63000800 | Zn                     | -1.26778700         | 0.27290500  | 0.29156900  |
| H | 1.11621600  | -2.10090200 | -3.14109700 | O                      | 0.29845500          | 1.44593700  | -0.06497900 |
| H | 1.96597500  | -1.89101100 | -4.67802700 | O                      | 3.09980400          | -0.69292400 | -0.06961600 |
| C | 3.27232800  | -1.85781700 | -2.88348200 | O                      | -2.96196100         | 0.06228400  | -0.48870200 |
| H | 3.18202300  | -2.72411400 | -2.22473900 | N                      | 2.97808400          | 1.72395300  | -1.41436600 |
| H | 4.09669700  | -2.05832000 | -3.57239700 | N                      | -2.19074600         | 1.81116700  | 1.35725200  |
| C | 3.57270100  | -0.58438400 | -2.04754200 | C                      | 0.28849800          | 2.80044200  | -0.14189200 |
| H | 4.37190000  | 0.00078200  | -2.52151800 | C                      | -0.89447400         | 3.54644600  | 0.07467500  |
| C | 3.92845800  | -0.91705800 | -0.54545100 | C                      | -0.85414300         | 4.94000300  | -0.03701000 |
| C | 5.02581800  | -2.00312800 | -0.50114800 | H                      | -1.77515900         | 5.49496400  | 0.13331500  |
| C | 6.12397000  | -2.02303400 | -1.37180000 | C                      | 0.30617100          | 5.64186600  | -0.36544900 |
| H | 6.22109200  | -1.27079900 | -2.14930000 | C                      | 1.47202600          | 4.89251000  | -0.53277400 |
| C | 7.10379600  | -3.01172100 | -1.26908200 | H                      | 2.40921900          | 5.40555300  | -0.74230300 |
| H | 7.94271500  | -3.01123400 | -1.96083700 | C                      | 1.49037000          | 3.50255700  | -0.40462800 |



|   |             |             |             |                         |              |             |             |
|---|-------------|-------------|-------------|-------------------------|--------------|-------------|-------------|
| C | 0.30127800  | 7.14240800  | -0.53594100 | H                       | -5.96362700  | 2.34913400  | 1.16044200  |
| H | -0.48531800 | 7.61170100  | 0.06515300  | C                       | -6.73977500  | 3.02264700  | -0.71309800 |
| H | 1.25932100  | 7.58373000  | -0.23865000 | H                       | -7.43125300  | 3.71573200  | -0.24007700 |
| H | 0.12375800  | 7.42742600  | -1.58190000 | C                       | -6.69341600  | 2.91718600  | -2.10231800 |
| C | 2.82278900  | 2.79349900  | -0.39901700 | H                       | -7.34668000  | 3.52573600  | -2.72222800 |
| H | 2.96486800  | 2.32557800  | 0.57667300  | C                       | -5.79590600  | 2.02000800  | -2.68587700 |
| H | 3.63620000  | 3.52324000  | -0.52302100 | H                       | -5.74784800  | 1.92532100  | -3.76822400 |
| C | 2.87498900  | 2.19278800  | -2.81167400 | C                       | -4.95528000  | 1.24542000  | -1.88837800 |
| H | 3.56791300  | 3.03446600  | -2.97274300 | H                       | -4.24721300  | 0.55816000  | -2.33393400 |
| H | 1.85831900  | 2.54070600  | -3.01078500 | O                       | -0.63787100  | -1.34330100 | 1.12589800  |
| C | 3.29126000  | 0.95576200  | -3.61104300 | C                       | 0.34532400   | -2.17203800 | 1.03439300  |
| H | 2.41920900  | 0.30770900  | -3.75739200 | C                       | 0.35352200   | -3.29795000 | 2.07586700  |
| H | 3.67989600  | 1.21608000  | -4.59917600 | C                       | 0.62444600   | -2.55673100 | 3.41615900  |
| C | 4.33611500  | 0.25185700  | -2.70534500 | C                       | 1.50232800   | -4.29444500 | 1.85040300  |
| H | 4.08522100  | -0.80232600 | -2.56509800 | C                       | -1.01745800  | -3.98727900 | 2.17282600  |
| H | 5.34655000  | 0.29419700  | -3.11729800 | H                       | 1.34624200   | -1.77613700 | 0.81555000  |
| C | 4.28062200  | 0.98203500  | -1.33976300 | H                       | -1.02528200  | -4.69711000 | 3.00809800  |
| H | 5.08960500  | 1.72075200  | -1.26880500 | H                       | -1.26809500  | -4.53767200 | 1.26253900  |
| C | 4.30817800  | -0.01334700 | -0.11160900 | H                       | -1.80835700  | -3.24964200 | 2.33385000  |
| C | 5.45824900  | -1.02604800 | -0.32070900 | H                       | 1.56850600   | -4.98074500 | 2.70255300  |
| C | 6.77531200  | -0.63161800 | -0.59326000 | H                       | 2.46088000   | -3.77120000 | 1.76071100  |
| H | 7.02775800  | 0.42157300  | -0.67203100 | H                       | 1.37208300   | -4.89550400 | 0.94874100  |
| C | 7.78336100  | -1.57914900 | -0.77303200 | H                       | 0.67606600   | -3.28190000 | 4.23690900  |
| H | 8.79763700  | -1.25175300 | -0.98813600 | H                       | -0.17477700  | -1.84109400 | 3.62949900  |
| C | 7.49093800  | -2.94117300 | -0.67701000 | H                       | 1.57748700   | -2.01405300 | 3.38631000  |
| H | 8.27578400  | -3.68062800 | -0.81429000 | C                       | -0.07525600  | -1.99684400 | -1.63472800 |
| C | 6.18155600  | -3.34163100 | -0.40783400 | C                       | 0.57078600   | -3.05606600 | -0.92528700 |
| H | 5.93999700  | -4.39953100 | -0.33668700 | C                       | -1.38535300  | -2.48503400 | -2.05296700 |
| C | 5.17215800  | -2.39265500 | -0.23468700 | C                       | -0.15162700  | -4.35846800 | -1.24178800 |
| H | 4.14763900  | -2.69131700 | -0.05000700 | C                       | -1.46707300  | -3.86542400 | -1.79251000 |
| C | 4.55725900  | 0.71629900  | 1.23528700  | H                       | -0.27036500  | -5.03594000 | -0.39392900 |
| C | 5.54806200  | 1.69037900  | 1.42379800  | H                       | 0.41950300   | -4.90310600 | -2.00777800 |
| H | 6.19327600  | 1.98557700  | 0.60221900  | C                       | -2.65255300  | -4.54775200 | -2.03508600 |
| C | 5.71658800  | 2.31427200  | 2.66069900  | C                       | -2.45160900  | -1.77666100 | -2.60957500 |
| H | 6.48611400  | 3.07324700  | 2.77857500  | C                       | -3.72906200  | -3.83834700 | -2.58313200 |
| C | 4.90122700  | 1.97024800  | 3.74045800  | C                       | -3.62763000  | -2.47180400 | -2.87880100 |
| H | 5.03098900  | 2.45804200  | 4.70292200  | H                       | -2.74339100  | -5.60853300 | -1.81636700 |
| C | 3.91940800  | 0.99335100  | 3.56855100  | H                       | -4.66349100  | -4.35686100 | -2.77983500 |
| H | 3.27844600  | 0.71122800  | 4.40046200  | H                       | -4.48572300  | -1.94529600 | -3.28564300 |
| C | 3.75251700  | 0.37399200  | 2.32947500  | H                       | -2.36336800  | -0.71204400 | -2.78234200 |
| H | 2.98677300  | -0.37824700 | 2.18081500  | O                       | 0.29619100   | -0.77860600 | -1.77296800 |
| C | -2.23690800 | 2.90650600  | 0.36678500  | F                       | 1.94081000   | -3.12397800 | -0.93060400 |
| H | -2.65595500 | 2.48392300  | -0.55044100 |                         |              |             |             |
| H | -2.94040000 | 3.67895700  | 0.71238500  | <b>Int<sub>GR</sub></b> |              |             |             |
| C | -1.65518100 | 2.19843100  | 2.67552200  | G <sub>gas</sub> =      | -6350.756603 | a.u.        |             |
| H | -0.57877700 | 2.36992600  | 2.59744500  | E <sub>solv</sub> =     | -6352.127169 | a.u.        |             |
| H | -2.12692700 | 3.13743500  | 3.00645400  | Zn                      | -1.51107000  | 0.38880100  | 0.17363000  |
| C | -2.03707700 | 1.02064100  | 3.59562500  | Zn                      | 1.21178900   | -0.34722000 | -0.55607300 |
| H | -1.17364700 | 0.37335700  | 3.77599700  | O                       | -0.37873100  | 0.68796200  | -1.43982700 |
| H | -2.38291700 | 1.38394600  | 4.56759200  | O                       | -2.89644200  | -0.80084900 | 0.58312800  |
| C | -3.14290600 | 0.25333300  | 2.82372600  | O                       | 2.81155600   | -1.17830700 | 0.05037300  |
| H | -2.75492400 | -0.70256000 | 2.46124800  | N                       | -2.86258600  | 1.90156200  | -0.18104500 |
| H | -4.02411400 | 0.03160000  | 3.42909000  | N                       | 2.31366300   | 0.35775400  | -2.20332700 |
| C | -3.50019600 | 1.15787900  | 1.62868900  | C                       | -0.27094100  | 1.95214900  | -1.89563500 |
| H | -4.21369900 | 1.92323200  | 1.96027000  | C                       | 0.97524100   | 2.50607800  | -2.27787500 |
| C | -4.03433100 | 0.42269100  | 0.31836600  | C                       | 1.01359400   | 3.79578300  | -2.81854900 |
| C | -4.80448600 | -0.85224800 | 0.75518400  | H                       | 1.98005400   | 4.20205500  | -3.11385500 |
| C | -6.07903600 | -0.81627100 | 1.33430900  | C                       | -0.12566800  | 4.58610900  | -2.97769100 |
| H | -6.60075700 | 0.12912100  | 1.44446700  | C                       | -1.34300500  | 4.03855600  | -2.56381400 |
| C | -6.70647100 | -1.99010700 | 1.75739000  | H                       | -2.25306200  | 4.62894100  | -2.66013400 |
| H | -7.69840900 | -1.93917300 | 2.20012900  | C                       | -1.43628900  | 2.74824200  | -2.04415600 |
| C | -6.06924900 | -3.22310000 | 1.60548100  | C                       | -0.05087000  | 5.96361600  | -3.59326900 |
| H | -6.55929900 | -4.13719700 | 1.93150800  | H                       | -0.80881600  | 6.63322700  | -3.17082900 |
| C | -4.80009100 | -3.26813100 | 1.02594100  | H                       | 0.93012100   | 6.42369800  | -3.43036300 |
| H | -4.29013800 | -4.21913300 | 0.89260100  | H                       | -0.21794000  | 5.93080500  | -4.67870400 |
| C | -4.17468900 | -2.09416400 | 0.60557700  | C                       | -2.78074300  | 2.19168700  | -1.64058200 |
| H | -3.18935100 | -2.12471500 | 0.15894400  | H                       | -2.96905700  | 1.25775700  | -2.16881600 |
| C | -4.98572000 | 1.34170500  | -0.49001400 | H                       | -3.58274100  | 2.89504900  | -1.90935200 |
| C | -5.89623300 | 2.24153100  | 0.08180200  | C                       | -2.68488200  | 3.10909400  | 0.65758300  |

|   |             |             |             |                        |                     |             |             |
|---|-------------|-------------|-------------|------------------------|---------------------|-------------|-------------|
| H | -3.36927600 | 3.90301800  | 0.31631600  | H                      | 2.95305700          | 0.30077400  | 1.83550700  |
| H | -1.66040900 | 3.47664200  | 0.56343500  | O                      | 0.02462900          | -2.08501100 | -0.70121800 |
| C | -3.05254200 | 2.61268300  | 2.05037800  | C                      | 0.47530400          | -3.09579200 | -0.16007000 |
| H | -2.19715200 | 2.08331000  | 2.48604500  | C                      | -0.31106300         | -4.36557500 | 0.00520500  |
| H | -3.31033100 | 3.42951200  | 2.73015600  | C                      | 0.40234100          | -5.41507200 | -0.88629700 |
| C | -4.22242300 | 1.63869900  | 1.78866800  | C                      | -1.77128700         | -4.17170700 | -0.41827200 |
| H | -4.14277200 | 0.74621800  | 2.41147800  | C                      | -0.21569200         | -4.80117600 | 1.48533800  |
| H | -5.18842000 | 2.10444400  | 2.00205600  | H                      | -0.66724500         | -5.79303600 | 1.59688500  |
| C | -4.13841400 | 1.25430000  | 0.28446800  | H                      | -0.74427200         | -4.09945400 | 2.13468800  |
| H | -4.96748500 | 1.69903800  | -0.28029800 | H                      | 0.82485800          | -4.85766000 | 1.82422100  |
| C | -4.09593000 | -0.31457200 | 0.06985800  | H                      | -2.34711600         | -5.07792500 | -0.20093700 |
| C | -5.27749000 | -0.97090400 | 0.81454400  | H                      | -1.85065000         | -3.96785000 | -1.49038200 |
| C | -6.55450100 | -0.39774200 | 0.89588100  | H                      | -2.22191800         | -3.32470200 | 0.10835500  |
| H | -6.74849400 | 0.57857700  | 0.46115700  | H                      | -0.10292500         | -6.38083700 | -0.77581700 |
| C | -7.59784900 | -1.05419900 | 1.55138300  | H                      | 1.45230700          | -5.54637600 | -0.59938000 |
| H | -8.57719300 | -0.58510600 | 1.60582300  | H                      | 0.36473400          | -5.13034100 | -1.94385900 |
| C | -7.38345300 | -2.30117100 | 2.13911000  | C                      | 0.45675000          | 0.26838100  | 2.36136400  |
| H | -8.19453700 | -2.81396300 | 2.64959700  | C                      | 0.63577200          | -0.87775100 | 3.04903700  |
| C | -6.11360200 | -2.87737300 | 2.07114600  | C                      | 0.62657200          | 1.37863300  | 3.30705900  |
| H | -5.93018900 | -3.84501300 | 2.53225400  | C                      | 0.94849900          | -0.66239900 | 4.50060800  |
| C | -5.07258900 | -2.21654600 | 1.41933300  | C                      | 0.92010400          | 0.85384000  | 4.58192600  |
| H | -4.07998800 | -2.64845100 | 1.38166300  | H                      | 1.93189500          | -1.06941000 | 4.77561700  |
| C | -4.23676900 | -0.65924900 | -1.44009700 | H                      | 0.20899900          | -1.13081000 | 5.16516100  |
| C | -5.36030000 | -0.28812900 | -2.19302000 | C                      | 1.14931100          | 1.70539100  | 5.65117900  |
| H | -6.19382200 | 0.21666700  | -1.71498500 | C                      | 0.55888000          | 2.75110500  | 3.08695100  |
| C | -5.43374900 | -0.56342800 | -3.55832600 | C                      | 1.07833700          | 3.09209500  | 5.43841500  |
| H | -6.31399600 | -0.26164100 | -4.12069600 | C                      | 0.78568700          | 3.60680100  | 4.17146000  |
| C | -4.38399200 | -1.22426100 | -4.20122100 | H                      | 1.38416800          | 1.31252800  | 6.63765100  |
| H | -4.43926400 | -1.43569900 | -5.26592900 | H                      | 1.25625000          | 3.77118300  | 6.26780000  |
| C | -3.26817500 | -1.61103700 | -3.45923400 | H                      | 0.74287500          | 4.68311300  | 4.02595400  |
| H | -2.44110500 | -2.12602300 | -3.94248300 | H                      | 0.35774200          | 3.13558400  | 2.09105500  |
| C | -3.19868600 | -1.33492200 | -2.09213900 | O                      | 0.21401800          | 0.45238100  | 1.05817500  |
| H | -2.32424700 | -1.62291700 | -1.52479100 | H                      | 1.52099400          | -3.07967200 | 0.18729000  |
| C | 2.30866200  | 1.82528900  | -2.02141600 | F                      | 0.56683400          | -2.12291700 | 2.51740800  |
| H | 2.62567200  | 2.02834100  | -0.99387800 | <b>TS<sub>SR</sub></b> |                     |             |             |
| H | 3.07503500  | 2.27584700  | -2.67270500 | G <sub>gas</sub>       | = -6350.736692 a.u. |             |             |
| C | 1.80790800  | -0.06200900 | -3.52875200 | E <sub>solv</sub>      | = -6352.11081 a.u.  |             |             |
| H | 0.73941300  | 0.14497800  | -3.59667000 | Zn                     | 1.65066500          | 0.08755700  | -0.47264000 |
| H | 2.33081400  | 0.49656200  | -4.32252900 | Zn                     | -1.30300400         | 0.28426000  | 0.32770900  |
| C | 2.15125800  | -1.54663400 | -3.57071800 | O                      | 0.28765700          | 1.43193700  | 0.07815500  |
| H | 1.38778900  | -2.10574400 | -3.01771700 | O                      | 3.19791400          | -0.71029800 | 0.17843600  |
| H | 2.18055000  | -1.93969000 | -4.59108200 | O                      | -2.98828300         | -0.09857100 | -0.37635200 |
| C | 3.51038000  | -1.62749600 | -2.84387800 | N                      | 2.82960900          | 1.53199700  | -1.39614200 |
| H | 3.55619800  | -2.48958200 | -2.17588900 | N                      | -2.25215700         | 1.85429400  | 1.34305400  |
| H | 4.34071700  | -1.71767000 | -3.54957200 | C                      | 0.30635200          | 2.77317200  | -0.07599200 |
| C | 3.64309500  | -0.30965200 | -2.03140600 | C                      | -0.86501400         | 3.55043100  | 0.09403000  |
| H | 4.41156800  | 0.33639900  | -2.47489200 | C                      | -0.79086500         | 4.93873300  | -0.05553300 |
| C | 3.93728000  | -0.58758300 | -0.50664000 | H                      | -1.70013200         | 5.52100000  | 0.08503000  |
| C | 5.14335400  | -1.54209000 | -0.37241300 | C                      | 0.39089700          | 5.60122900  | -0.39072300 |
| C | 6.29114800  | -1.44800200 | -1.17109100 | C                      | 1.53570500          | 4.81722600  | -0.55117300 |
| H | 6.35546000  | -0.69650400 | -1.95271500 | H                      | 2.48093000          | 5.30019400  | -0.79356100 |
| C | 7.36541500  | -2.32031800 | -0.98921900 | C                      | 1.52012600          | 3.43158000  | -0.38703000 |
| H | 8.24257400  | -2.23311200 | -1.62581300 | C                      | 0.42728100          | 7.09763600  | -0.59387700 |
| C | 7.31369300  | -3.30133900 | 0.00239300  | H                      | -0.35961400         | 7.59934000  | -0.01994000 |
| H | 8.15015700  | -3.98050500 | 0.14581800  | H                      | 1.38953600          | 7.52155500  | -0.28493300 |
| C | 6.17615300  | -3.40079100 | 0.80560800  | H                      | 0.27969700          | 7.36488600  | -1.64924200 |
| H | 6.12385900  | -4.16027300 | 1.58235600  | C                      | 2.82450000          | 2.67136700  | -0.44824000 |
| C | 5.10187600  | -2.53066700 | 0.61711400  | H                      | 3.05440300          | 2.26652900  | 0.54067500  |
| H | 4.21129900  | -2.59906600 | 1.23143800  | H                      | 3.64466500          | 3.35807100  | -0.70375700 |
| C | 4.31679700  | 0.71808600  | 0.24547500  | C                      | 2.48855600          | 1.89513800  | -2.78547900 |
| C | 5.28477600  | 1.61677200  | -0.22742300 | H                      | 3.13377900          | 2.72236000  | -3.12444900 |
| H | 5.81637900  | 1.41280000  | -1.15211900 | H                      | 1.44925800          | 2.22827200  | -2.83620800 |
| C | 5.58109900  | 2.78456300  | 0.47519600  | C                      | 2.77152000          | 0.60113500  | -3.55514800 |
| H | 6.32786400  | 3.47185900  | 0.08470600  | H                      | 1.87681500          | -0.03080400 | -3.54561500 |
| C | 4.92314800  | 3.07149500  | 1.67424900  | H                      | 3.03079500          | 0.79604500  | -4.59936400 |
| H | 5.15095600  | 3.98430300  | 2.21873600  | C                      | 3.91719400          | -0.07764700 | -2.75751600 |
| C | 3.97725600  | 2.17300000  | 2.16787100  | H                      | 3.64029000          | -1.09422900 | -2.46625500 |
| H | 3.45752100  | 2.37765100  | 3.09958900  | H                      | 4.84841800          | -0.14711900 | -3.32353900 |
| C | 3.68315900  | 1.00586300  | 1.45883100  |                        |                     |             |             |

|   |             |             |             |                         |                     |             |             |
|---|-------------|-------------|-------------|-------------------------|---------------------|-------------|-------------|
| C | 4.11952800  | 0.78358300  | -1.48713700 | H                       | 1.31355500          | -4.72647700 | 1.44194600  |
| H | 4.93186700  | 1.50414700  | -1.64985700 | H                       | -0.32257700         | -5.07793400 | 2.05813300  |
| C | 4.37833200  | -0.07658600 | -0.18779700 | H                       | 2.26733100          | -2.81924200 | 3.52735500  |
| C | 5.45144500  | -1.14020200 | -0.52635800 | H                       | 1.53612200          | -1.28156900 | 3.02538000  |
| C | 6.73218900  | -0.79835300 | -0.98189300 | H                       | 2.33076900          | -2.29534700 | 1.82577700  |
| H | 7.01440900  | 0.24412000  | -1.08902600 | H                       | -0.02508000         | -3.32369200 | 4.60902400  |
| C | 7.66660500  | -1.78419300 | -1.29955900 | H                       | -1.48995500         | -3.39805100 | 3.61131000  |
| H | 8.65375000  | -1.49590900 | -1.65278500 | H                       | -0.72472000         | -1.83140800 | 3.95073600  |
| C | 7.33747000  | -3.13429000 | -1.16108500 | C                       | -0.17212500         | -2.10830800 | -1.31738100 |
| H | 8.06586300  | -3.90365600 | -1.40449400 | C                       | 0.40549800          | -3.16075200 | -0.58366500 |
| C | 6.06473000  | -3.48302900 | -0.70840700 | C                       | -1.41917000         | -2.61417800 | -1.89607300 |
| H | 5.79454500  | -4.53085700 | -0.59920100 | C                       | -0.27263500         | -4.47158900 | -0.93237500 |
| C | 5.12827600  | -2.49482800 | -0.39709600 | C                       | -1.50929900         | -3.99673900 | -1.66035500 |
| H | 4.13138800  | -2.75484000 | -0.06394700 | H                       | -0.51666000         | -5.09899400 | -0.07122000 |
| C | 4.90616600  | 0.78549600  | 0.98919300  | H                       | 0.38105200          | -5.06525400 | -1.58731600 |
| C | 5.86139700  | 1.80353700  | 0.85370000  | C                       | -2.63791200         | -4.69942300 | -2.06719200 |
| H | 6.27155600  | 2.05097300  | -0.12063400 | C                       | -2.41156200         | -1.92212000 | -2.58847700 |
| C | 6.29227700  | 2.53868200  | 1.95964300  | C                       | -3.64388500         | -4.00725800 | -2.75322600 |
| H | 7.02691300  | 3.32898000  | 1.82532100  | C                       | -3.52780400         | -2.63536900 | -3.02038400 |
| C | 5.78068400  | 2.26609500  | 3.22894400  | H                       | -2.73409600         | -5.76469900 | -1.87292500 |
| H | 6.11412900  | 2.83978900  | 4.08978700  | H                       | -4.52896500         | -4.54258100 | -3.08618400 |
| C | 4.83534700  | 1.24975300  | 3.37787900  | H                       | -4.32824700         | -2.12092800 | -3.54417600 |
| H | 4.42804000  | 1.02428100  | 4.36063300  | H                       | -2.31575900         | -0.85504400 | -2.74291700 |
| C | 4.40439000  | 0.51981100  | 2.26995500  | O                       | 0.18688700          | -0.87340100 | -1.37472700 |
| H | 3.66120900  | -0.26142800 | 2.37125200  | H                       | -1.39658900         | -2.81229400 | 1.12507300  |
| C | -2.23177500 | 2.94082400  | 0.34437800  | F                       | 1.74187500          | -3.17087700 | -0.30658700 |
| H | -2.62256700 | 2.52113600  | -0.58776800 |                         |                     |             |             |
| H | -2.93487500 | 3.73206600  | 0.64626000  | <b>Int<sub>RR</sub></b> |                     |             |             |
| C | -1.73992300 | 2.22548400  | 2.67248200  | G <sub>gas</sub>        | = -6350.753215 a.u. |             |             |
| H | -0.67069100 | 2.43930800  | 2.60821700  | E <sub>solv</sub>       | = -6352.128199 a.u. |             |             |
| H | -2.25341200 | 3.13194800  | 3.03299600  | Zn                      | 1.57250800          | 0.52033800  | -0.64915900 |
| C | -2.07704400 | 0.99806800  | 3.53463900  | Zn                      | -1.19575400         | 0.19352100  | 0.23623000  |
| H | -1.21529900 | 0.32553700  | 3.56848500  | O                       | 0.33283600          | 1.53483900  | 0.53844100  |
| H | -2.31909300 | 1.28327900  | 4.56209500  | O                       | 2.94842800          | -0.70655800 | -0.32039000 |
| C | -3.26489900 | 0.31626400  | 2.80249200  | O                       | -2.81906200         | -0.75711300 | 0.00364400  |
| H | -2.98320600 | -0.68307400 | 2.45575600  | N                       | 2.95787200          | 2.03118300  | -0.87200700 |
| H | -4.14889200 | 0.19360700  | 3.43098800  | N                       | -2.33535900         | 1.59305500  | 1.37515600  |
| C | -3.57349400 | 1.21774900  | 1.58654800  | C                       | 0.21247100          | 2.86549600  | 0.35046500  |
| H | -4.29443500 | 1.98989200  | 1.88540000  | C                       | -1.04400300         | 3.51532000  | 0.37749500  |
| C | -4.07395600 | 0.45017600  | 0.29511200  | C                       | -1.09628300         | 4.90440700  | 0.22535100  |
| C | -5.03475300 | -0.68264600 | 0.73384800  | H                       | -2.07101000         | 5.38954100  | 0.25204200  |
| C | -6.21742100 | -0.43253400 | 1.44237000  | C                       | 0.04222300          | 5.68917000  | 0.03048300  |
| H | -6.50400200 | 0.58821700  | 1.67862900  | C                       | 1.27559900          | 5.03214600  | 0.01645600  |
| C | -7.04385500 | -1.48153700 | 1.84590800  | H                       | 2.18815500          | 5.61199700  | -0.11370600 |
| H | -7.95580600 | -1.26690500 | 2.39780300  | C                       | 1.37914400          | 3.65233700  | 0.18833600  |
| C | -6.70607200 | -2.80160000 | 1.53644900  | C                       | -0.05825300         | 7.18175000  | -0.17976200 |
| H | -7.35283200 | -3.61867700 | 1.84604300  | H                       | -0.17937700         | 7.43176800  | -1.24271800 |
| C | -5.53563400 | -3.05767300 | 0.82145000  | H                       | -0.91838700         | 7.60502200  | 0.35105300  |
| H | -5.26375800 | -4.07839400 | 0.56226900  | H                       | 0.84108200          | 7.69843000  | 0.17387700  |
| C | -4.70511400 | -2.00675100 | 0.42687200  | C                       | 2.73242000          | 2.98857900  | 0.24591700  |
| H | -3.79813100 | -2.19397800 | -0.13410300 | H                       | 2.82306800          | 2.42396000  | 1.17422500  |
| C | -4.85489100 | 1.38878700  | -0.66353800 | H                       | 3.53141000          | 3.74468000  | 0.23379500  |
| C | -5.70495800 | 2.42128000  | -0.24354200 | C                       | 2.94052200          | 2.67743900  | -2.20496200 |
| H | -5.84182800 | 2.63178900  | 0.81266900  | H                       | 3.61329200          | 3.55065600  | -2.20617900 |
| C | -6.39326700 | 3.21149600  | -1.16774200 | H                       | 1.92993900          | 3.02170500  | -2.43663400 |
| H | -7.03890500 | 4.01112300  | -0.81282400 | C                       | 3.46050500          | 1.57361300  | -3.11803800 |
| C | -6.25200700 | 2.98028800  | -2.53548400 | H                       | 2.65251500          | 0.86056300  | -3.32601700 |
| H | -6.78520600 | 3.59604900  | -3.25504200 | H                       | 3.81941800          | 1.95715600  | -4.07715100 |
| C | -5.41776400 | 1.94688200  | -2.96732600 | C                       | 4.56425800          | 0.90238400  | -2.27328300 |
| H | -5.29971800 | 1.75063600  | -4.03042200 | H                       | 4.56798500          | -0.17983900 | -2.41125500 |
| C | -4.73026400 | 1.16417500  | -2.04136200 | H                       | 5.55568400          | 1.27536000  | -2.54575400 |
| H | -4.07688600 | 0.36546900  | -2.36723800 | C                       | 4.25034500          | 1.26073200  | -0.79362600 |
| O | -0.32125800 | -1.08451800 | 1.32840500  | H                       | 5.01595500          | 1.93011300  | -0.38262600 |
| C | -0.42847200 | -2.35453100 | 1.38110500  | C                       | 4.08540600          | -0.03102700 | 0.10564100  |
| C | 0.38084900  | -3.04751400 | 2.48595800  | C                       | 5.31709800          | -0.94365000 | -0.06272300 |
| C | -0.52786700 | -2.88639300 | 3.73853800  | C                       | 6.63080800          | -0.45924400 | -0.12817800 |
| C | 1.71314600  | -2.31789200 | 2.72522000  | H                       | 6.82514900          | 0.60914300  | -0.09872100 |
| C | 0.61546600  | -4.54762300 | 2.26179000  | C                       | 7.71213300          | -1.33359900 | -0.25007800 |
| H | 1.04531700  | -4.98619200 | 3.16934900  | H                       | 8.72224100          | -0.93514000 | -0.30527600 |

|   |             |             |             |                                       |             |             |             |
|---|-------------|-------------|-------------|---------------------------------------|-------------|-------------|-------------|
| C | 7.49761700  | -2.71138000 | -0.30680800 | C                                     | -0.26621700 | -1.02241500 | -2.37910600 |
| H | 8.33864200  | -3.39336200 | -0.40193600 | C                                     | -0.91425600 | -0.96607600 | -3.56285600 |
| C | 6.19206800  | -3.20279600 | -0.24901300 | C                                     | 0.19464100  | -2.41036200 | -2.19695300 |
| H | 6.01129600  | -4.27378500 | -0.30204600 | C                                     | -1.01033700 | -2.29386900 | -4.25366900 |
| C | 5.11310000  | -2.32665000 | -0.13121000 | C                                     | -0.24830900 | -3.18330400 | -3.29128000 |
| H | 4.09418500  | -2.69503500 | -0.10786400 | H                                     | -0.55615300 | -2.28394700 | -5.25447600 |
| C | 3.97373800  | 0.33680600  | 1.61188600  | H                                     | -2.05523500 | -2.61176600 | -4.37999400 |
| C | 4.94149000  | 1.09881000  | 2.28232900  | C                                     | 0.05978700  | -4.53213100 | -3.37166600 |
| H | 5.83223200  | 1.43179600  | 1.75870800  | C                                     | 0.97613200  | -2.97565100 | -1.19072200 |
| C | 4.77941000  | 1.44425600  | 3.62400500  | C                                     | 0.83393100  | -5.11228300 | -2.35421700 |
| H | 5.53928800  | 2.04262300  | 4.12061100  | C                                     | 1.29538200  | -4.33649200 | -1.28687700 |
| C | 3.64705700  | 1.02579900  | 4.32793000  | H                                     | -0.28260400 | -5.13193600 | -4.21186300 |
| H | 3.51846600  | 1.30068600  | 5.37160600  | H                                     | 1.09029800  | -6.16694100 | -2.40771300 |
| C | 2.68897400  | 0.24938800  | 3.67615000  | H                                     | 1.92106900  | -4.79238300 | -0.52282200 |
| H | 1.80134900  | -0.08728300 | 4.20753100  | H                                     | 1.37448300  | -2.36585100 | -0.38851800 |
| C | 2.85547600  | -0.09606800 | 2.33376300  | O                                     | -0.08696900 | -0.02442600 | -1.49435700 |
| H | 2.10721700  | -0.69267600 | 1.82872700  | H                                     | -1.92672500 | -2.35533500 | 1.13710600  |
| C | -2.36090300 | 2.76703500  | 0.47540000  | F                                     | -1.47398700 | 0.13877400  | -4.10066100 |
| H | -2.65573000 | 2.41623300  | -0.51805600 | <b>TS<sub>RR</sub></b>                |             |             |             |
| H | -3.15128400 | 3.46268600  | 0.79984200  | G <sub>gas</sub> = -6350.738924 a.u.  |             |             |             |
| C | -1.85217300 | 1.92125300  | 2.73301300  | E <sub>solv</sub> = -6352.119442 a.u. |             |             |             |
| H | -0.79390800 | 2.18057100  | 2.69753900  | Zn                                    | 1.86680700  | 0.45907600  | 0.24733100  |
| H | -2.41485400 | 2.78226500  | 3.13045100  | Zn                                    | -0.97495300 | -0.98897700 | -0.03543600 |
| C | -2.13957500 | 0.64967400  | 3.52663900  | O                                     | 0.45731700  | -0.69644400 | 1.22881000  |
| H | -1.30235800 | -0.04534900 | 3.40443700  | O                                     | 2.99175100  | -0.20806800 | -1.14833200 |
| H | -2.25197700 | 0.84861000  | 4.59628700  | O                                     | -2.47211000 | -0.95905400 | -1.15182400 |
| C | -3.42203500 | 0.08273400  | 2.87535900  | N                                     | 3.32780900  | -0.38888600 | 1.60304500  |
| H | -3.31823200 | -0.98090900 | 2.64636700  | N                                     | -2.25447400 | -1.64724900 | 1.55558400  |
| H | -4.29333700 | 0.18099700  | 3.52699000  | C                                     | 0.34589200  | -0.58259700 | 2.56664400  |
| C | -3.63620500 | 0.88700600  | 1.56515300  | C                                     | -0.88821000 | -0.40461600 | 3.22415100  |
| H | -4.42480800 | 1.63868600  | 1.70749400  | C                                     | -0.88881100 | -0.22288600 | 4.61193800  |
| C | -3.96125300 | -0.04264800 | 0.33248400  | H                                     | -1.84464000 | -0.08043100 | 5.11432100  |
| C | -5.08753600 | -1.03103000 | 0.70844900  | C                                     | 0.28138300  | -0.22870300 | 5.37541000  |
| C | -6.20770100 | -0.67024600 | 1.46975100  | C                                     | 1.48113900  | -0.51442700 | 4.71206700  |
| H | -6.30907500 | 0.34197600  | 1.85052300  | H                                     | 2.40130400  | -0.61293000 | 5.28622700  |
| C | -7.20346500 | -1.60168900 | 1.76828100  | C                                     | 1.52296400  | -0.71833000 | 3.33528400  |
| H | -8.05939400 | -1.30008100 | 2.36714700  | C                                     | 0.25242400  | 0.03838400  | 6.86186400  |
| C | -7.10019600 | -2.91412400 | 1.30444000  | H                                     | 0.45396300  | 1.09518100  | 7.08428900  |
| H | -7.87538000 | -3.64001500 | 1.53597700  | H                                     | -0.72471000 | -0.20298800 | 7.29511900  |
| C | -5.99112000 | -3.28280200 | 0.54091000  | H                                     | 1.00928400  | -0.55181100 | 7.39152000  |
| H | -5.89997100 | -4.30112100 | 0.17008500  | C                                     | 2.74487600  | -1.26469400 | 2.64204100  |
| C | -4.99530300 | -2.35005600 | 0.24820100  | H                                     | 2.44044200  | -2.18406300 | 2.14096200  |
| H | -4.12948800 | -2.62440100 | -0.34388600 | H                                     | 3.51938300  | -1.52329700 | 3.38206900  |
| C | -4.45911600 | 0.79244600  | -0.87632800 | C                                     | 4.07569400  | 0.75274700  | 2.18894000  |
| C | -5.51343900 | 1.71238900  | -0.78539000 | H                                     | 4.65831200  | 0.41297000  | 3.06137600  |
| H | -6.04260700 | 1.85018500  | 0.15278000  | H                                     | 3.37373300  | 1.52443900  | 2.51381600  |
| C | -5.90524700 | 2.46184600  | -1.89485200 | C                                     | 4.99876800  | 1.18950100  | 1.05939200  |
| H | -6.72237300 | 3.17325500  | -1.80156500 | H                                     | 4.43233900  | 1.76679600  | 0.32259700  |
| C | -5.25240900 | 2.30070500  | -3.11968700 | H                                     | 5.82979500  | 1.80496500  | 1.41781300  |
| H | -5.55512900 | 2.88871900  | -3.98239600 | C                                     | 5.45225500  | -0.15182400 | 0.46096200  |
| C | -4.21190500 | 1.37728600  | -3.22392700 | H                                     | 5.72509000  | -0.06291300 | -0.59082800 |
| H | -3.68801800 | 1.23433100  | -4.16382800 | H                                     | 6.32548000  | -0.53279000 | 1.00257500  |
| C | -3.82508300 | 0.62777300  | -2.11142600 | C                                     | 4.25408000  | -1.11806400 | 0.66108700  |
| H | -3.01608800 | -0.08725400 | -2.17899900 | H                                     | 4.58734300  | -2.04693300 | 1.13885400  |
| O | -0.23645600 | -1.31769000 | 1.41214800  | C                                     | 3.51808200  | -1.40781800 | -0.70788300 |
| C | -0.91542600 | -2.33309100 | 1.57701700  | C                                     | 4.53881400  | -1.96654400 | -1.71987900 |
| C | -0.48022600 | -3.50530800 | 2.40795500  | C                                     | 5.30999500  | -3.10661600 | -1.45585100 |
| C | 1.02850700  | -3.48567700 | 2.68023200  | H                                     | 5.19829400  | -3.63531400 | -0.51325000 |
| C | -0.91709400 | -4.79805400 | 1.68740100  | C                                     | 6.22476500  | -3.58422200 | -2.39427100 |
| C | -1.28121000 | -3.35720100 | 3.73160400  | H                                     | 6.81590700  | -4.46865800 | -2.16920200 |
| H | -1.07352200 | -4.22168800 | 4.37179000  | C                                     | 6.37932900  | -2.93042700 | -3.61886300 |
| H | -2.36187800 | -3.32132600 | 3.55064700  | H                                     | 7.09022800  | -3.30270800 | -4.35210800 |
| H | -0.98935800 | -2.45007000 | 4.27210300  | C                                     | 5.61248300  | -1.79658300 | -3.89106700 |
| H | -0.68824300 | -5.66419000 | 2.31804400  | H                                     | 5.72492800  | -1.27945900 | -4.84113100 |
| H | -0.39486100 | -4.91500900 | 0.73322200  | C                                     | 4.70073700  | -1.31810900 | -2.94788700 |
| H | -1.99561200 | -4.79792100 | 1.48977500  | H                                     | 4.10352000  | -0.43370400 | -3.13776800 |
| H | 1.30490300  | -4.33780900 | 3.31040900  | C                                     | 2.37360600  | -2.46438900 | -0.60260100 |
| H | 1.33340800  | -2.56685300 | 3.18886500  | C                                     | 2.39956500  | -3.61356100 | 0.19376200  |
| H | 1.59589700  | -3.54921400 | 1.74664800  |                                       |             |             |             |

|   |             |             |             |                                      |             |             |             |
|---|-------------|-------------|-------------|--------------------------------------|-------------|-------------|-------------|
| H | 3.27569500  | -3.84402600 | 0.79319100  | C                                    | 2.19469400  | 5.27409100  | -0.26227100 |
| C | 1.30014800  | -4.47875800 | 0.25533400  | C                                    | 0.85115400  | 7.24855700  | -0.70965300 |
| H | 1.34190800  | -5.35247400 | 0.90089500  | C                                    | 2.10089400  | 6.62395600  | -0.60993200 |
| C | 0.15971000  | -4.22779100 | -0.50529000 | H                                    | -1.29741500 | 7.03023900  | -0.54235900 |
| H | -0.69207500 | -4.90044200 | -0.46076800 | H                                    | 0.79710400  | 8.29886800  | -0.98353000 |
| C | 0.13255800  | -3.10673500 | -1.34737300 | H                                    | 3.00344300  | 7.19511900  | -0.81032800 |
| H | -0.72822300 | -2.92215800 | -1.98634800 | H                                    | 3.15229300  | 4.76706200  | -0.18817100 |
| C | 1.23372300  | -2.24628100 | -1.39543000 | O                                    | 1.80131900  | 2.35749000  | 0.64143600  |
| H | 1.22343100  | -1.36649900 | -2.02695800 | H                                    | -1.58003600 | 1.64493100  | -1.39986300 |
| C | -2.20693300 | -0.48727200 | 2.48196800  | F                                    | -1.09431500 | 1.87816900  | 1.02985700  |
| H | -2.39295900 | 0.41734700  | 1.90349300  | <b>Int<sub>SR</sub>-Boc</b>          |             |             |             |
| H | -3.02378400 | -0.57221700 | 3.21604400  | G <sub>gas</sub> = -6750.421925 a.u. |             |             |             |
| C | -1.85516800 | -2.92454100 | 2.23460800  | E <sub>solv</sub> = -6751.94291 a.u. |             |             |             |
| H | -0.80825200 | -3.13274300 | 1.99779400  | Zn                                   | -1.50472700 | 0.12398000  | 1.00592800  |
| H | -1.92980200 | -2.81004400 | 3.32104700  | Zn                                   | 1.08286200  | 1.17824300  | -0.72217000 |
| C | -2.80762600 | -4.00638900 | 1.70468000  | O                                    | -0.25276100 | 1.69888200  | 0.58542100  |
| H | -2.28489200 | -4.94093200 | 1.47874900  | O                                    | -2.65150700 | -0.26462500 | -0.44929900 |
| H | -3.57572100 | -4.23360100 | 2.45289900  | O                                    | 2.70093300  | 0.23255700  | -0.91724700 |
| C | -3.44808600 | -3.36705000 | 0.47216500  | N                                    | -3.05554900 | 1.37093400  | 1.73112500  |
| H | -2.80151400 | -3.46666100 | -0.40646700 | N                                    | 2.18631800  | 2.93165500  | -0.55527900 |
| H | -4.42177100 | -3.78920100 | 0.21964900  | C                                    | -0.31668200 | 2.89775700  | 1.21432100  |
| C | -3.54121800 | -1.87709500 | 0.83214700  | C                                    | 0.84195100  | 3.67889400  | 1.41353500  |
| H | -4.39105500 | -1.71839700 | 1.51098200  | C                                    | 0.75096000  | 4.89408200  | 2.09771700  |
| C | -3.68398200 | -0.98027300 | -0.46388300 | H                                    | 1.65854200  | 5.47842000  | 2.24039500  |
| C | -4.77996200 | -1.62944700 | -1.33730900 | C                                    | -0.45637500 | 5.37272600  | 2.60884300  |
| C | -6.11706900 | -1.66247800 | -0.91900200 | C                                    | -1.60116200 | 4.61022200  | 2.35843600  |
| H | -6.40079100 | -1.18355900 | 0.01485000  | H                                    | -2.56857800 | 4.97982800  | 2.69466900  |
| C | -7.09146000 | -2.28607900 | -1.69732200 | C                                    | -1.56121300 | 3.40387500  | 1.65720300  |
| H | -8.12408100 | -2.30366200 | -1.35748100 | C                                    | -0.52535500 | 6.65814700  | 3.39898400  |
| C | -6.74394400 | -2.87618400 | -2.91568100 | H                                    | -1.46600600 | 7.19107900  | 3.21855900  |
| H | -7.50326300 | -3.35760400 | -3.52652300 | H                                    | -0.46296900 | 6.46963700  | 4.47941900  |
| C | -5.41677500 | -2.83332700 | -3.34470700 | H                                    | 0.29790700  | 7.33319000  | 3.13998600  |
| H | -5.13751200 | -3.28254300 | -4.29485000 | C                                    | -2.85004300 | 2.74473900  | 1.22994000  |
| C | -4.44106900 | -2.21548400 | -2.55882500 | H                                    | -2.85187200 | 2.69326600  | 0.14311300  |
| H | -3.40552500 | -2.17247800 | -2.87673100 | H                                    | -3.70686200 | 3.37068100  | 1.52603500  |
| C | -4.15302000 | 0.47252400  | -0.20257600 | C                                    | -3.25790700 | 1.32012100  | 3.19590800  |
| C | -4.74350900 | 0.94351500  | 0.97364600  | H                                    | -3.97361200 | 2.10523500  | 3.49253200  |
| H | -4.88724200 | 0.28112600  | 1.82089500  | H                                    | -2.30875000 | 1.51258800  | 3.70180500  |
| C | -5.15138500 | 2.27756500  | 1.09228000  | C                                    | -3.82485200 | -0.08189900 | 3.45680100  |
| H | -5.59127900 | 2.62168600  | 2.02494800  | H                                    | -3.01561400 | -0.76152500 | 3.72973500  |
| C | -4.99929900 | 3.15810900  | 0.02390500  | H                                    | -4.55121900 | -0.06645400 | 4.27471200  |
| H | -5.31857400 | 4.19294500  | 0.11468000  | C                                    | -4.45337800 | -0.51111300 | 2.10582900  |
| C | -4.44570000 | 2.68997000  | -1.17286000 | H                                    | -3.94982200 | -1.39746300 | 1.71491900  |
| H | -4.34314200 | 3.35806700  | -2.02499100 | H                                    | -5.51570200 | -0.75144500 | 2.18488700  |
| C | -4.03094700 | 1.36578900  | -1.27961300 | C                                    | -4.23523500 | 0.66992900  | 1.13544500  |
| H | -3.61121800 | 0.99103800  | -2.20746600 | H                                    | -5.09974800 | 1.35019100  | 1.16426700  |
| O | 0.07925600  | 0.55282300  | -1.04208100 | C                                    | -3.94134000 | 0.22093300  | -0.35863900 |
| C | -0.50441200 | 1.54422800  | -1.56937800 | C                                    | -4.93801500 | -0.90686200 | -0.73800600 |
| C | 0.04227700  | 2.16426300  | -2.83911000 | C                                    | -6.32975900 | -0.79836900 | -0.60569300 |
| C | -0.37691200 | 1.12392900  | -3.92060800 | H                                    | -6.77476900 | 0.10520800  | -0.20225300 |
| C | 1.57258000  | 2.28870600  | -2.82594900 | C                                    | -7.17152900 | -1.85465200 | -0.95745100 |
| C | -0.64064200 | 3.50534900  | -3.14106600 | H                                    | -8.24729000 | -1.74496600 | -0.84258500 |
| H | -0.38919200 | 3.83289700  | -4.15599900 | C                                    | -6.63702600 | -3.04828500 | -1.44585200 |
| H | -0.31694300 | 4.28556700  | -2.44945300 | H                                    | -7.29219200 | -3.87145900 | -1.71958100 |
| H | -1.73331700 | 3.41940700  | -3.07958600 | C                                    | -5.25216700 | -3.17648100 | -1.55791800 |
| H | 1.92424000  | 2.59702900  | -3.81746900 | H                                    | -4.81887700 | -4.11075800 | -1.90893700 |
| H | 2.04589900  | 1.33762900  | -2.56532400 | C                                    | -4.41330600 | -2.11920900 | -1.20165100 |
| H | 1.90180900  | 3.04142200  | -2.10514800 | H                                    | -3.33591200 | -2.21752300 | -1.24048600 |
| H | -0.08824500 | 1.49599400  | -4.91040100 | C                                    | -4.12871000 | 1.42542400  | -1.33081400 |
| H | -1.45972600 | 0.95061500  | -3.92082000 | C                                    | -5.30794400 | 2.17773600  | -1.42723500 |
| H | 0.12169300  | 0.16562400  | -3.74659900 | H                                    | -6.17173700 | 1.92695000  | -0.82196000 |
| C | 0.83536400  | 3.16165800  | 0.37361300  | C                                    | -5.40002800 | 3.27160000  | -2.29035400 |
| C | -0.54017000 | 2.92973700  | 0.35298100  | H                                    | -6.32779200 | 3.83645800  | -2.34185500 |
| C | 1.01603500  | 4.57550300  | -0.01156400 | C                                    | -4.31005800 | 3.64319000  | -3.07898100 |
| C | -1.33532400 | 4.20076000  | 0.21953300  | H                                    | -4.38174600 | 4.49607500  | -3.74911100 |
| C | -0.24195300 | 5.20215400  | -0.09156600 | C                                    | -3.12682400 | 2.90889300  | -2.98681900 |
| H | -1.84785000 | 4.42949800  | 1.16505400  | H                                    | -2.26183400 | 3.18714700  | -3.58551400 |
| H | -2.10960300 | 4.16122600  | -0.55535300 | C                                    | -3.04098600 | 1.81753500  | -2.12188500 |
| C | -0.33121800 | 6.53860200  | -0.45837900 |                                      |             |             |             |

|   |             |             |             |                                       |             |             |             |
|---|-------------|-------------|-------------|---------------------------------------|-------------|-------------|-------------|
| H | -2.11773100 | 1.26585100  | -2.01961000 | H                                     | 0.68355800  | -2.59582900 | -4.52342200 |
| C | 2.18103000  | 3.20709500  | 0.90715200  | H                                     | 0.49451200  | -0.82174500 | -4.53538100 |
| H | 2.46613100  | 2.28161800  | 1.41140300  | H                                     | -0.32965300 | -1.81510800 | -5.75210200 |
| H | 2.96037800  | 3.94775300  | 1.13725400  | C                                     | 0.87159900  | -1.90548400 | 0.03147000  |
| C | 1.75975100  | 4.07335000  | -1.39102700 | C                                     | 1.64863500  | -2.95050000 | -0.62728600 |
| H | 0.71119900  | 4.30789600  | -1.19578500 | C                                     | 2.01955500  | -4.06172600 | 0.15071900  |
| H | 2.36407300  | 4.96213500  | -1.14677500 | C                                     | 2.07302200  | -2.86829300 | -1.96431300 |
| C | 2.04115400  | 3.56911100  | -2.80678600 | C                                     | 2.74800500  | -5.10318000 | -0.41960500 |
| H | 1.19300000  | 2.96686700  | -3.15480000 | H                                     | 1.73173600  | -4.10537100 | 1.19747200  |
| H | 2.17692500  | 4.38840700  | -3.51799000 | C                                     | 2.81584300  | -3.90217700 | -2.52341700 |
| C | 3.30094500  | 2.68047500  | -2.64585500 | H                                     | 1.88703700  | -1.96605700 | -2.53263200 |
| H | 3.15813700  | 1.70411700  | -3.11476600 | C                                     | 3.14177300  | -5.02744000 | -1.75750800 |
| H | 4.18598500  | 3.13347300  | -3.09737900 | H                                     | 3.02045500  | -5.96402800 | 0.18389600  |
| C | 3.50228300  | 2.49792100  | -1.11828200 | H                                     | 3.16177700  | -3.82143800 | -3.55003700 |
| H | 4.27125100  | 3.18889700  | -0.74829300 | H                                     | 3.72223600  | -5.83297700 | -2.19899000 |
| C | 3.83465000  | 1.01148600  | -0.71461800 | H                                     | 0.99504500  | -1.82898700 | 1.10643600  |
| C | 5.00068000  | 0.47736000  | -1.57512200 | <b>TS<sub>SR</sub>-Boc</b>            |             |             |             |
| C | 6.08653100  | 1.26151000  | -1.98603900 | G <sub>gas</sub> = -6750.420259 a.u.  |             |             |             |
| H | 6.12873300  | 2.31831300  | -1.73778000 | E <sub>solv</sub> = -6751.936398 a.u. |             |             |             |
| C | 7.13089400  | 0.70566800  | -2.72819400 | Zn                                    | -1.48468600 | 0.35738000  | 0.98439700  |
| H | 7.95906500  | 1.33506700  | -3.04463200 | Zn                                    | 1.04336000  | 0.88673300  | -0.87236900 |
| C | 7.11318700  | -0.64913400 | -3.06270700 | O                                     | -0.26478400 | 1.79413800  | 0.27825600  |
| H | 7.92661800  | -1.08167900 | -3.63949700 | O                                     | -2.73935000 | -0.35388600 | -0.22712200 |
| C | 6.04192000  | -1.44135100 | -2.64415900 | O                                     | 2.70970500  | 0.00847800  | -0.77401200 |
| H | 6.01549600  | -2.50092700 | -2.88862200 | N                                     | -2.99967800 | 1.70612600  | 1.58955000  |
| C | 4.99922500  | -0.88130700 | -1.90796900 | N                                     | 2.10984900  | 2.66684900  | -1.20367600 |
| H | 4.16868200  | -1.48882800 | -1.57503300 | C                                     | -0.31925100 | 3.09830700  | 0.61737400  |
| C | 4.31740300  | 0.90715100  | 0.75796900  | C                                     | 0.84212200  | 3.89823500  | 0.57263500  |
| C | 5.32742200  | 1.72493000  | 1.28329800  | C                                     | 0.77198700  | 5.23907600  | 0.95841300  |
| H | 5.80981400  | 2.46793200  | 0.65461700  | H                                     | 1.67904600  | 5.84018600  | 0.91800800  |
| C | 5.73661600  | 1.59386200  | 2.61046600  | C                                     | -0.41625500 | 5.82462900  | 1.40152400  |
| H | 6.51532500  | 2.24521100  | 2.99974800  | C                                     | -1.56519700 | 5.02693600  | 1.39534400  |
| C | 5.15526100  | 0.62711000  | 3.43467000  | H                                     | -2.51778000 | 5.46737100  | 1.68593200  |
| H | 5.47561000  | 0.52439100  | 4.46816000  | C                                     | -1.54781900 | 3.69025500  | 0.99355100  |
| C | 4.16739300  | -0.21019000 | 2.91500400  | C                                     | -0.46102600 | 7.25966300  | 1.87155000  |
| H | 3.71363700  | -0.97998800 | 3.53326000  | H                                     | -1.41677500 | 7.73459000  | 1.62181400  |
| C | 3.75525100  | -0.06753000 | 1.58911400  | H                                     | -0.33986200 | 7.33094100  | 2.96118400  |
| H | 2.98941700  | -0.71097000 | 1.17721300  | H                                     | 0.33816300  | 7.85606500  | 1.41747400  |
| O | -0.00903500 | 0.25260300  | -2.32151600 | C                                     | -2.84772000 | 2.94492800  | 0.79513900  |
| O | -0.24653100 | -0.85794200 | -1.80797500 | H                                     | -2.91137900 | 2.65911500  | -0.25375900 |
| C | -0.74375800 | -2.18265800 | 2.58733500  | H                                     | -3.69813600 | 3.61405200  | 1.00060300  |
| C | -1.41663900 | -3.18841700 | 1.95739700  | C                                     | -3.09036700 | 1.96285700  | 3.04327400  |
| C | 0.26523300  | -2.84699200 | 3.43939800  | H                                     | -3.78865800 | 2.79704000  | 3.22365100  |
| C | -0.96338900 | -4.56623000 | 2.33822700  | H                                     | -2.10802200 | 2.25303800  | 3.42366700  |
| C | 0.16122900  | -4.24616900 | 3.30410300  | C                                     | -3.62346900 | 0.64956900  | 3.63861000  |
| H | -0.60636100 | -5.14337100 | 1.47135200  | H                                     | -2.79768900 | 0.05644500  | 4.03587600  |
| H | -1.75846500 | -5.16388400 | 2.80814500  | H                                     | -4.32592300 | 0.84746200  | 4.45365500  |
| F | -2.40616900 | -3.01590300 | 1.04525700  | C                                     | -4.28987600 | -0.08299200 | 2.44594500  |
| C | 1.04594700  | -5.08207400 | 3.96957600  | H                                     | -3.74125800 | -0.99712900 | 2.19914500  |
| C | 1.24986100  | -2.27183400 | 4.23870800  | H                                     | -5.32477200 | -0.37064300 | 2.64131200  |
| C | 2.04152800  | -4.50888300 | 4.77855600  | C                                     | -4.20440100 | 0.88551400  | 1.24901800  |
| C | 2.13926000  | -3.12008700 | 4.91055300  | H                                     | -5.08554900 | 1.54372800  | 1.22532900  |
| H | 0.97664300  | -6.16288000 | 3.86626700  | C                                     | -4.02381600 | 0.14440600  | -0.14019200 |
| H | 2.74173500  | -5.15177000 | 5.30519800  | C                                     | -5.02479800 | -1.03772200 | -0.21635400 |
| H | 2.91587700  | -2.69501000 | 5.54199500  | C                                     | -6.40050300 | -0.91538500 | 0.02263500  |
| H | 1.31437000  | -1.19116400 | 4.32449200  | H                                     | -6.82602600 | 0.04297200  | 0.30325200  |
| O | -0.81768100 | -0.87452000 | 2.48658900  | C                                     | -7.24748600 | -2.02096200 | -0.07132000 |
| N | 0.07867700  | -1.01127000 | -0.46087700 | H                                     | -8.31092800 | -1.90093500 | 0.12139800  |
| O | -0.80654100 | -1.88689200 | -2.38070000 | C                                     | -6.73321900 | -3.27526300 | -0.40538900 |
| C | -1.24965900 | -1.90201000 | -3.81167900 | H                                     | -7.39286100 | -4.13609100 | -0.48042100 |
| C | -1.88257000 | -3.28683400 | -3.92329000 | C                                     | -5.36179700 | -3.41158000 | -0.62558800 |
| C | -2.27386500 | -0.79952800 | -4.05703000 | H                                     | -4.94376400 | -4.38741400 | -0.86457200 |
| C | -0.01544100 | -1.77342300 | -4.70385400 | C                                     | -4.51655900 | -2.30526800 | -0.52554500 |
| H | -2.76861400 | -3.35489200 | -3.28652900 | H                                     | -3.44556900 | -2.39730100 | -0.65776700 |
| H | -2.75900200 | -0.98025800 | -5.02247700 | C                                     | -4.30685800 | 1.11670300  | -1.32208300 |
| H | -1.16886900 | -4.06051700 | -3.62347900 | C                                     | -5.49263800 | 1.85249200  | -1.45633700 |
| H | -2.18412700 | -3.46829700 | -4.95991500 | H                                     | -6.28592800 | 1.75632600  | -0.72285200 |
| H | -1.80700100 | 0.18489500  | -4.08138300 | C                                     | -5.68009400 | 2.73094100  | -2.52500000 |
| H | -3.03561600 | -0.80547100 | -3.27511400 |                                       |             |             |             |



|   |             |             |             |                                       |             |             |             |
|---|-------------|-------------|-------------|---------------------------------------|-------------|-------------|-------------|
| C | 4.94995900  | -2.55347200 | 0.13649200  | N                                     | -1.30016500 | -2.12401200 | 1.46098100  |
| H | 3.94610800  | -2.60398700 | 0.53875700  | O                                     | 0.29738500  | -2.34027500 | 3.07713700  |
| C | 5.27753800  | 1.04270200  | 0.62204400  | C                                     | 1.25361700  | -1.84672100 | 4.11148300  |
| C | 6.22356100  | 1.90085800  | 0.04212600  | C                                     | 1.84776900  | -3.15334000 | 4.63397000  |
| H | 6.45287700  | 1.83643900  | -1.01716900 | C                                     | 2.32840000  | -0.96661200 | 3.47902800  |
| C | 6.87794400  | 2.87356600  | 0.80118100  | C                                     | 0.44848400  | -1.12128400 | 5.18899600  |
| H | 7.59990400  | 3.53068900  | 0.32254000  | H                                     | 2.38750400  | -3.67276400 | 3.83597600  |
| C | 6.60323100  | 3.00687500  | 2.16213300  | H                                     | 3.13782900  | -0.82871400 | 4.20513000  |
| H | 7.10910500  | 3.76587400  | 2.75306700  | H                                     | 1.06055000  | -3.81273100 | 5.01293800  |
| C | 5.66800800  | 2.15519400  | 2.75302700  | H                                     | 2.54907500  | -2.94152000 | 5.44713200  |
| H | 5.44185500  | 2.24639900  | 3.81282100  | H                                     | 1.93855300  | 0.01303800  | 3.20179000  |
| C | 5.01515800  | 1.18732100  | 1.99040500  | H                                     | 2.74902600  | -1.42214100 | 2.57882300  |
| H | 4.27863400  | 0.53279400  | 2.43743000  | H                                     | -0.32713700 | -1.77662100 | 5.59884800  |
| C | -1.91184300 | 3.28202900  | -0.09853500 | H                                     | -0.02226100 | -0.22256300 | 4.78423100  |
| H | -2.33059800 | 2.61143200  | -0.85708900 | H                                     | 1.11762400  | -0.82476000 | 6.00368100  |
| H | -2.59548200 | 4.14299300  | -0.03904700 | C                                     | -1.09399500 | -3.26478300 | 0.89372600  |
| C | -1.32198000 | 3.26743000  | 2.30421000  | H                                     | -0.16079200 | -3.81718900 | 1.04913500  |
| H | -0.23808700 | 3.27926200  | 2.17751400  | C                                     | -2.08852800 | -3.85022800 | 0.00602300  |
| H | -1.68169000 | 4.30902400  | 2.31715400  | C                                     | -1.97229700 | -5.19833400 | -0.37627500 |
| C | -1.79550100 | 2.49532800  | 3.55148800  | C                                     | -3.13408600 | -3.06135000 | -0.51554300 |
| H | -0.99712800 | 1.85183300  | 3.93175900  | C                                     | -2.90201800 | -5.76158400 | -1.24654000 |
| H | -2.07463500 | 3.18453700  | 4.35390400  | H                                     | -1.15558900 | -5.79943900 | 0.01795800  |
| C | -2.99500100 | 1.64583600  | 3.06116100  | C                                     | -4.05355900 | -3.63118700 | -1.38888000 |
| H | -2.71669600 | 0.58953900  | 3.01975200  | H                                     | -3.18115300 | -2.00491000 | -0.26666200 |
| H | -3.87687400 | 1.72132900  | 3.70022600  | C                                     | -3.94245800 | -4.97656900 | -1.75356200 |
| C | -3.29069400 | 2.15160200  | 1.63612600  | H                                     | -2.81445200 | -6.80545000 | -1.53459800 |
| H | -3.92883900 | 3.04381500  | 1.70561500  | H                                     | -4.84551200 | -3.01631700 | -1.80543000 |
| C | -3.92898500 | 1.07932300  | 0.66699600  | H                                     | -4.65991500 | -5.41232800 | -2.44386000 |
| C | -4.96694300 | 0.27857800  | 1.49343500  | <b>TS<sub>gas</sub>-Boc</b>           |             |             |             |
| C | -6.22342700 | 0.80363100  | 1.82247800  | G <sub>gas</sub> = -6750.420977 a.u.  |             |             |             |
| H | -6.51578900 | 1.78133400  | 1.45103800  | E <sub>solv</sub> = -6751.938244 a.u. |             |             |             |
| C | -7.11926900 | 0.07423300  | 2.60620200  | Zn                                    | -1.62770500 | -0.31429200 | -0.53833100 |
| H | -8.09189100 | 0.49738900  | 2.84600000  | Zn                                    | 1.50562000  | -0.61061500 | 0.30242300  |
| C | -6.77446300 | -1.19688300 | 3.07043300  | O                                     | -0.08106700 | -1.56463100 | -0.50845100 |
| H | -7.47532300 | -1.76870900 | 3.67358900  | O                                     | -3.23442300 | 0.01463100  | 0.38039300  |
| C | -5.52307500 | -1.72512800 | 2.74903800  | O                                     | 3.23147100  | -0.07479900 | -0.26675000 |
| H | -5.24019200 | -2.71354600 | 3.10398600  | N                                     | -2.74510800 | -1.50122900 | -1.80833400 |
| C | -4.62570200 | -0.99148200 | 1.97161700  | N                                     | 2.43509700  | -2.38688300 | 0.86538800  |
| H | -3.64670700 | -1.38750700 | 1.73226600  | C                                     | -0.18262100 | -2.90269600 | -0.74059500 |
| C | -4.67990100 | 1.70732900  | -0.53681100 | C                                     | 0.96100400  | -3.73528500 | -0.65733400 |
| C | -5.25299200 | 2.98498000  | -0.55825500 | C                                     | 0.85836500  | -5.10482500 | -0.90928600 |
| H | -5.16632900 | 3.64349100  | 0.30000400  | H                                     | 1.75968400  | -5.71049000 | -0.83283100 |
| C | -5.94480000 | 3.44981100  | -1.68169200 | C                                     | -0.34086000 | -5.71473500 | -1.27424300 |
| H | -6.36845300 | 4.45120000  | -1.67306400 | C                                     | -1.45723900 | -4.88661500 | -1.36405400 |
| C | -6.09267600 | 2.63648200  | -2.80317200 | H                                     | -2.41574600 | -5.32189400 | -1.64099500 |
| H | -6.63242000 | 2.99509300  | -3.67572900 | C                                     | -1.41334800 | -3.51498600 | -1.09257000 |
| C | -5.54388900 | 1.35099700  | -2.78727800 | C                                     | -0.42837900 | -7.20057000 | -1.52874200 |
| H | -5.66667200 | 0.69692800  | -3.64758200 | H                                     | -1.27649600 | -7.44628000 | -2.17717900 |
| C | -4.84628800 | 0.89696600  | -1.67051700 | H                                     | 0.48146100  | -7.58003700 | -2.00783600 |
| H | -4.41261700 | -0.09551100 | -1.65972000 | H                                     | -0.56019200 | -7.76233800 | -0.59394500 |
| O | -0.25929800 | -0.28661600 | 2.29483800  | C                                     | -2.73945400 | -2.78911400 | -1.09251200 |
| C | -0.37429100 | -1.52921800 | 2.28101300  | H                                     | -3.03565400 | -2.58107200 | -0.06044200 |
| C | 0.01508200  | -1.64739200 | -1.37567900 | H                                     | -3.51770500 | -3.44463100 | -1.51015800 |
| C | 0.73526400  | -2.79760000 | -1.42860800 | C                                     | -2.35917000 | -1.56048700 | -3.22843100 |
| C | -0.96286900 | -1.69933600 | -2.47004700 | H                                     | -2.95817700 | -2.32729600 | -3.74642400 |
| C | 0.34251900  | -3.69804900 | -2.55983700 | H                                     | -1.30491000 | -1.83509600 | -3.31309500 |
| C | -0.78936800 | -2.90243900 | -3.18351300 | C                                     | -2.68118100 | -0.14410400 | -3.73603200 |
| H | -0.00197900 | -4.68111700 | -2.20928800 | H                                     | -1.79021400 | 0.48556400  | -3.66456600 |
| H | 1.17068800  | -3.87369100 | -3.26130500 | H                                     | -3.00619500 | -0.15809900 | -4.78004100 |
| F | 1.74466400  | -3.12161100 | -0.58148200 | C                                     | -3.77735200 | 0.38226100  | -2.76888500 |
| C | -1.61569000 | -3.20372000 | -4.25405900 | H                                     | -3.41791200 | 1.25912900  | -2.22299300 |
| C | -1.95236800 | -0.78457100 | -2.81600200 | H                                     | -4.69829900 | 0.67662300  | -3.27590000 |
| C | -2.61493300 | -2.28509400 | -4.61297700 | C                                     | -4.04093100 | -0.77214600 | -1.77818000 |
| C | -2.77863700 | -1.09145000 | -3.90249800 | H                                     | -4.82241000 | -1.42625200 | -2.18647500 |
| H | -1.50017800 | -4.13480100 | -4.80364700 | C                                     | -4.39652700 | -0.33275300 | -0.30043900 |
| H | -3.26998700 | -2.50676400 | -5.45144600 | C                                     | -5.34786500 | 0.88797500  | -0.38371400 |
| H | -3.55896300 | -0.39249000 | -4.19009600 | C                                     | -6.60506700 | 0.81802000  | -0.99941200 |
| H | -2.10739700 | 0.10895700  | -2.22120300 | H                                     | -6.96113200 | -0.12416400 | -1.40428400 |
| O | 0.12651100  | -0.63906000 | -0.52062700 |                                       |             |             |             |



|   |             |             |             |                                       |             |             |             |
|---|-------------|-------------|-------------|---------------------------------------|-------------|-------------|-------------|
| C | -7.41916700 | 1.94669900  | -1.09582700 | C                                     | 0.42739900  | 4.73033600  | -3.77661400 |
| H | -8.39018300 | 1.87010700  | -1.57924500 | H                                     | -0.27552000 | 6.91543300  | -1.23493200 |
| C | -6.99226300 | 3.16825200  | -0.56982600 | H                                     | 0.58217400  | 6.86966200  | -3.56760400 |
| H | -7.62710100 | 4.04778800  | -0.64183600 | H                                     | 0.80689400  | 4.73506200  | -4.79469700 |
| C | -5.74567900 | 3.24376500  | 0.05196500  | H                                     | 0.19164900  | 2.57204600  | -3.67725300 |
| H | -5.40336900 | 4.18819400  | 0.47014100  | O                                     | -0.74331800 | 1.21746300  | -1.35650400 |
| C | -4.92945300 | 2.11393000  | 0.14230200  | N                                     | 0.77025500  | 1.00932800  | 1.28711200  |
| H | -3.95934800 | 2.16133000  | 0.61860500  | O                                     | -0.28040700 | 1.37665100  | 3.30465000  |
| C | -5.13796900 | -1.46321400 | 0.46665200  | C                                     | -1.21529500 | 1.04104500  | 4.39894600  |
| C | -6.07825700 | -2.33120200 | -0.10674300 | C                                     | -1.52032300 | 2.42057400  | 4.98202400  |
| H | -6.32479000 | -2.26442100 | -1.16209700 | C                                     | -2.48355100 | 0.39084800  | 3.84330000  |
| C | -6.71477100 | -3.31301900 | 0.65685900  | C                                     | -0.48919800 | 0.14547700  | 5.40267400  |
| H | -7.43333700 | -3.97762700 | 0.18318600  | H                                     | -1.99781200 | 3.04820300  | 4.22269200  |
| C | -6.42880800 | -3.44403100 | 2.01550000  | H                                     | -3.25283400 | 0.38366000  | 4.62345300  |
| H | -6.92153200 | -4.20943300 | 2.60948700  | H                                     | -0.59980900 | 2.91153200  | 5.31506200  |
| C | -5.50045800 | -2.58025200 | 2.60036400  | H                                     | -2.19622700 | 2.32681900  | 5.83785400  |
| H | -5.26526700 | -2.66802600 | 3.65855900  | H                                     | -2.29461400 | -0.63389700 | 3.52395200  |
| C | -4.86550700 | -1.60486700 | 1.83324100  | H                                     | -2.85925200 | 0.94880400  | 2.98165300  |
| H | -4.13104700 | -0.94260500 | 2.26991000  | H                                     | 0.43184800  | 0.62594100  | 5.74986600  |
| C | 2.33513600  | -3.18511500 | -0.37633900 | H                                     | -0.24073200 | -0.81452800 | 4.94512600  |
| H | 2.65548300  | -2.54183900 | -1.20097900 | H                                     | -1.13342100 | -0.03566600 | 6.27017800  |
| H | 3.05812700  | -4.01194800 | -0.33122400 | C                                     | 0.92315400  | 2.33893600  | 1.17954800  |
| C | 1.96862900  | -3.08849500 | 2.08220500  | H                                     | 0.58789000  | 2.92256700  | 2.03361600  |
| H | 0.87828800  | -3.10643300 | 2.09349000  | C                                     | 1.92029100  | 3.00136800  | 0.34012000  |
| H | 2.33725000  | -4.12575200 | 2.06963400  | C                                     | 2.44414100  | 4.22354800  | 0.80162400  |
| C | 2.58234400  | -2.28268900 | 3.24761700  | C                                     | 2.35178700  | 2.50402100  | -0.90100500 |
| H | 1.81353900  | -1.69676600 | 3.75570500  | C                                     | 3.40530200  | 4.91003200  | 0.06373300  |
| H | 3.03115800  | -2.95521200 | 3.98473900  | H                                     | 2.11114900  | 4.61966800  | 1.75822600  |
| C | 3.64452000  | -1.36596900 | 2.58921500  | C                                     | 3.30430300  | 3.19589300  | -1.63879000 |
| H | 3.28753600  | -0.33213600 | 2.52273500  | H                                     | 1.93391200  | 1.58599600  | -1.28646100 |
| H | 4.59339400  | -1.34174000 | 3.12815000  | C                                     | 3.83956900  | 4.39383700  | -1.15911000 |
| C | 3.81688000  | -1.92441600 | 1.16854300  | H                                     | 3.81274100  | 5.84389200  | 0.44065600  |
| H | 4.48562000  | -2.79574900 | 1.20268800  | H                                     | 3.63178800  | 2.79559700  | -2.59346100 |
| C | 4.30147200  | -0.87850800 | 0.09263600  | H                                     | 4.59085200  | 4.92413500  | -1.73761000 |
| C | 5.42135800  | -0.02612900 | 0.74397100  | <b>Int<sub>RS</sub>-Boc</b>           |             |             |             |
| C | 6.66341800  | -0.56862500 | 1.10111900  | G <sub>gas</sub> = -6750.410723 a.u.  |             |             |             |
| H | 6.88654300  | -1.60775900 | 0.88021100  | E <sub>solv</sub> = -6751.934941 a.u. |             |             |             |
| C | 7.63311100  | 0.21553400  | 1.72704000  | Zn                                    | 1.35656100  | -0.52761600 | 0.29957500  |
| H | 8.59025700  | -0.22539900 | 1.99530100  | Zn                                    | -1.40527400 | -0.42641500 | -0.68315200 |
| C | 7.38051500  | 1.56229400  | 1.99959100  | O                                     | 0.15259600  | -1.84069600 | -0.55660700 |
| H | 8.13846800  | 2.17517400  | 2.48115300  | O                                     | 2.94273700  | -0.19368000 | -0.74130100 |
| C | 6.14852200  | 2.11073900  | 1.64208100  | O                                     | -3.04212800 | 0.49545700  | -0.83917100 |
| H | 5.93500900  | 3.15863900  | 1.84019700  | N                                     | 2.55965900  | -1.80720100 | 1.38944700  |
| C | 5.17710600  | 1.32090000  | 1.02451200  | N                                     | -2.40959900 | -2.07282700 | -1.60025700 |
| H | 4.21917400  | 1.73655600  | 0.74777100  | C                                     | -0.04664400 | -3.02314300 | 0.06196500  |
| C | 4.89465900  | -1.55208300 | -1.17379900 | C                                     | -1.30127500 | -3.67556800 | 0.03412400  |
| C | 5.63582000  | -2.74166400 | -1.17531000 | C                                     | -1.43798600 | -4.92676500 | 0.64614100  |
| H | 5.81171300  | -3.28478100 | -0.25130500 | H                                     | -2.41319600 | -5.41121500 | 0.61288400  |
| C | 6.15303400  | -3.26890600 | -2.36154100 | C                                     | -0.39049300 | -5.56944100 | 1.30554200  |
| H | 6.71622000  | -4.19866100 | -2.33423100 | C                                     | 0.84598900  | -4.91878200 | 1.31667800  |
| C | 5.94581300  | -2.61055300 | -3.57309400 | H                                     | 1.69682000  | -5.39773400 | 1.79938500  |
| H | 6.34604600  | -3.02054700 | -4.49672700 | C                                     | 1.03799500  | -3.68312600 | 0.70022700  |
| C | 5.21640900  | -1.41919700 | -3.58406700 | C                                     | -0.58723800 | -6.89974700 | 1.99390300  |
| H | 5.04816800  | -0.89349000 | -4.52116700 | H                                     | -1.40847500 | -7.46709700 | 1.54209500  |
| C | 4.69781900  | -0.90005000 | -2.39905900 | H                                     | 0.31635900  | -7.51793500 | 1.93954000  |
| H | 4.11843300  | 0.01623900  | -2.39610800 | H                                     | -0.82849600 | -6.77281500 | 3.05838800  |
| O | -0.16254800 | -0.71830100 | 2.42242700  | C                                     | 2.42381700  | -3.08853300 | 0.64404600  |
| C | 0.05686600  | 0.48997600  | 2.36887900  | H                                     | 2.68302100  | -2.87336600 | -0.39339600 |
| C | -0.80115000 | 2.44681600  | -0.99700700 | H                                     | 3.16437600  | -3.80481000 | 1.02762300  |
| C | -1.07576900 | 3.00326600  | 0.26256400  | C                                     | 2.33707500  | -1.92208100 | 2.84270900  |
| C | -0.40008500 | 3.56278100  | -1.86007600 | H                                     | 2.96922900  | -2.72716700 | 3.25092400  |
| C | -1.09456900 | 4.50718100  | 0.22377100  | H                                     | 1.29431800  | -2.17790300 | 3.03591700  |
| C | -0.55121500 | 4.77553400  | -1.16463600 | C                                     | 2.76635400  | -0.54590900 | 3.37400900  |
| H | -0.47200900 | 4.96877900  | 1.00304500  | H                                     | 1.89581600  | 0.11526500  | 3.44205500  |
| H | -2.11618300 | 4.89246900  | 0.35096100  | H                                     | 3.19170400  | -0.61974000 | 4.37862900  |
| F | -1.79643000 | 2.34914400  | 1.20999700  | C                                     | 3.78742100  | -0.02815500 | 2.32285400  |
| C | -0.18532500 | 5.97167400  | -1.76657800 | H                                     | 3.43189700  | 0.88744400  | 1.83912200  |
| C | 0.08188900  | 3.52446700  | -3.16751300 | H                                     | 4.76585300  | 0.20271900  | 2.74848800  |
| C | 0.30117300  | 5.94011000  | -3.07988100 |                                       |             |             |             |

|   |             |             |             |                                       |             |             |             |
|---|-------------|-------------|-------------|---------------------------------------|-------------|-------------|-------------|
| C | 3.89362600  | -1.14354000 | 1.26313800  | H                                     | -3.01404300 | 3.19912900  | 2.76182300  |
| H | 4.66668000  | -1.86290000 | 1.56455900  | H                                     | -1.39860600 | 3.91360300  | 2.83840800  |
| C | 4.13771600  | -0.63713000 | -0.21904800 | C                                     | -1.74509500 | 2.20057500  | 5.30613600  |
| C | 5.15292400  | 0.53838500  | -0.17346200 | C                                     | -0.76198500 | -0.23794400 | 4.26352900  |
| C | 6.46328100  | 0.40685700  | 0.30488200  | C                                     | -1.38710400 | 1.14664600  | 6.16179900  |
| H | 6.82869200  | -0.55933500 | 0.63706400  | C                                     | -0.90753700 | -0.06058000 | 5.64412100  |
| C | 7.32187100  | 1.50616500  | 0.35669500  | H                                     | -2.13702300 | 3.12999200  | 5.71279500  |
| H | 8.33442100  | 1.37978400  | 0.73247400  | H                                     | -1.49569000 | 1.26706800  | 7.23629800  |
| C | 6.88664500  | 2.76109000  | -0.07487800 | H                                     | -0.65307800 | -0.87220700 | 6.32085900  |
| H | 7.55662900  | 3.61636100  | -0.03736900 | H                                     | -0.41965400 | -1.17848000 | 3.84486600  |
| C | 5.58367100  | 2.90212300  | -0.55424200 | O                                     | -0.61110500 | -0.08260000 | 1.17666800  |
| H | 5.22778000  | 3.87356700  | -0.89102700 | N                                     | 1.11288800  | 1.64515700  | 0.04399200  |
| C | 4.72558000  | 1.80151200  | -0.59967800 | O                                     | 1.46844700  | 2.56709300  | -1.99281100 |
| H | 3.70925300  | 1.90105200  | -0.95896700 | C                                     | 1.55606300  | 2.49024700  | -3.48116200 |
| C | 4.73210200  | -1.76848700 | -1.10493000 | C                                     | 2.62360800  | 3.54174600  | -3.77760100 |
| C | 5.74309200  | -2.64714000 | -0.68964700 | C                                     | 2.03284100  | 1.09251200  | -3.87523600 |
| H | 6.15255300  | -2.58453100 | 0.31426200  | C                                     | 0.20259700  | 2.86577300  | -4.08190600 |
| C | 6.23952200  | -3.63351500 | -1.54476000 | H                                     | 3.57310300  | 3.26391500  | -3.30929700 |
| H | 7.01930900  | -4.30506700 | -1.19359400 | H                                     | 2.33751000  | 1.10111400  | -4.92713600 |
| C | 5.73445900  | -3.76220700 | -2.83871900 | H                                     | 2.31677000  | 4.52015800  | -3.39396300 |
| H | 6.11816500  | -4.53129300 | -3.50404200 | H                                     | 2.77496300  | 3.62123600  | -4.85873300 |
| C | 4.72464000  | -2.89668800 | -3.26336400 | H                                     | 1.24752700  | 0.34645100  | -3.74213500 |
| H | 4.31371400  | -2.98979600 | -4.26591700 | H                                     | 2.88606800  | 0.80608700  | -3.25466300 |
| C | 4.23073400  | -1.91505900 | -2.40468600 | H                                     | -0.10793400 | 3.85925400  | -3.73983300 |
| H | 3.42375900  | -1.26189300 | -2.71196600 | H                                     | -0.56538100 | 2.14077400  | -3.80678400 |
| C | -2.57514700 | -3.05435200 | -0.51240100 | H                                     | 0.28751800  | 2.89255600  | -5.17367700 |
| H | -3.08670700 | -2.54439000 | 0.30704200  | C                                     | 1.18807300  | 2.57085600  | 0.93836900  |
| H | -3.25458000 | -3.85666300 | -0.84634200 | C                                     | 0.87185400  | 3.99749000  | 0.91010200  |
| C | -1.74791800 | -2.62826900 | -2.79811500 | C                                     | 0.19645500  | 4.65275800  | -0.13701000 |
| H | -0.70876800 | -2.86443700 | -2.56751600 | C                                     | 1.25020800  | 4.74070900  | 2.04507900  |
| H | -2.26456800 | -3.54891000 | -3.11794000 | C                                     | -0.07387800 | 6.01364300  | -0.04733800 |
| C | -1.91559600 | -1.50869400 | -3.82152200 | H                                     | -0.13285500 | 4.10240900  | -1.00600900 |
| H | -1.13633700 | -0.75454600 | -3.65877500 | C                                     | 0.98276600  | 6.10416700  | 2.12805100  |
| H | -1.82546500 | -1.86691900 | -4.85121100 | H                                     | 1.75734800  | 4.23771800  | 2.86481400  |
| C | -3.30669300 | -0.91711900 | -3.49564600 | C                                     | 0.32001000  | 6.74415300  | 1.07851000  |
| H | -3.27919300 | 0.17422600  | -3.48297800 | H                                     | -0.60204400 | 6.50815300  | -0.85743000 |
| H | -4.06172900 | -1.21935700 | -4.22609600 | H                                     | 1.28569800  | 6.66354300  | 3.00830000  |
| C | -3.67966200 | -1.45261300 | -2.08626000 | H                                     | 0.10436600  | 7.80728400  | 1.13894400  |
| H | -4.44374500 | -2.23869200 | -2.16302900 | H                                     | 1.59559600  | 2.22492400  | 1.88901500  |
| C | -4.13765100 | -0.29845500 | -1.11650500 | F                                     | -1.69809700 | 2.58507500  | 0.35569100  |
| C | -5.23100700 | 0.55747000  | -1.79441000 | <b>TS<sub>gas</sub>-Boc</b>           |             |             |             |
| C | -6.27856900 | 0.01511900  | -2.55054000 | G <sub>gas</sub> = -6750.408099 a.u.  |             |             |             |
| H | -6.33765700 | -1.05684200 | -2.71693200 | E <sub>solv</sub> = -6751.929787 a.u. |             |             |             |
| C | -7.25499300 | 0.83723300  | -3.11583000 | Zn                                    | 1.52120600  | -0.52416400 | 0.03496900  |
| H | -8.05495900 | 0.39574500  | -3.70553700 | Zn                                    | -1.59255300 | -0.31644000 | -0.70093000 |
| C | -7.20325000 | 2.21934000  | -2.92814600 | O                                     | 0.10869200  | -1.75588800 | -0.38502200 |
| H | -7.96375600 | 2.86065800  | -3.36665000 | O                                     | 3.01759500  | -0.13710700 | -1.04985800 |
| C | -6.16297000 | 2.76826600  | -2.17539100 | O                                     | -3.17668700 | 0.55332200  | -1.30019600 |
| H | -6.11090000 | 3.84435500  | -2.02501400 | N                                     | 2.72937300  | -1.61225900 | 1.27228800  |
| C | -5.18459500 | 1.94518000  | -1.61703400 | N                                     | -2.53056300 | -2.13765600 | -1.22689500 |
| H | -4.36177100 | 2.35467500  | -1.04156100 | C                                     | -0.05300200 | -2.82950500 | 0.41562700  |
| C | -4.76075600 | -0.86567900 | 0.19095800  | C                                     | -1.33183900 | -3.40355200 | 0.61940100  |
| C | -5.78129700 | -1.82741500 | 0.20415500  | C                                     | -1.45528800 | -4.53437200 | 1.43206900  |
| H | -6.19599200 | -2.19843900 | -0.72848800 | H                                     | -2.44872400 | -4.95743900 | 1.57584900  |
| C | -6.27606900 | -2.32937800 | 1.40835100  | C                                     | -0.37033000 | -5.13528100 | 2.07310100  |
| H | -7.06080900 | -3.08217600 | 1.39464300  | C                                     | 0.88772200  | -4.57710000 | 1.84248100  |
| C | -5.76685800 | -1.87174400 | 2.62661100  | H                                     | 1.76538500  | -5.03372600 | 2.29779900  |
| H | -6.14825700 | -2.26970600 | 3.56355400  | C                                     | 1.06693300  | -3.46365600 | 1.01983200  |
| C | -4.76872000 | -0.89656400 | 2.62571000  | C                                     | -0.55511000 | -6.32599500 | 2.98396400  |
| H | -4.35991500 | -0.52534600 | 3.56264300  | H                                     | 0.36317800  | -6.91894200 | 3.06047500  |
| C | -4.27929500 | -0.39666800 | 1.41781500  | H                                     | -0.82918500 | -6.01783400 | 4.00246600  |
| H | -3.50231700 | 0.35594500  | 1.40209800  | H                                     | -1.35128800 | -6.98783500 | 2.62404800  |
| O | -0.06200300 | 0.90620700  | -1.76160800 | C                                     | 2.47057500  | -2.98027700 | 0.73708600  |
| C | 0.75749400  | 1.70667600  | -1.29071700 | H                                     | 2.64398600  | -2.94455800 | -0.34062900 |
| C | -1.04902300 | 0.89379700  | 1.94961100  | H                                     | 3.20936200  | -3.67625800 | 1.15883000  |
| C | -1.52576100 | 2.13014100  | 1.61389900  | C                                     | 2.62432100  | -1.54277400 | 2.74663100  |
| C | -1.09486200 | 0.81891000  | 3.42075400  | H                                     | 3.20811500  | -2.36657000 | 3.18619900  |
| C | -1.94168600 | 2.95878700  | 2.78958500  | H                                     | 1.58557000  | -1.66445600 | 3.05193400  |
| C | -1.60181200 | 2.02877700  | 3.93795200  |                                       |             |             |             |

|   |             |             |             |                                       |             |             |             |
|---|-------------|-------------|-------------|---------------------------------------|-------------|-------------|-------------|
| C | 3.22797900  | -0.17639500 | 3.10949800  | C                                     | 0.56159200  | 1.63560400  | -1.22403500 |
| H | 2.43424300  | 0.55132200  | 3.30867400  | C                                     | -1.27197500 | 0.82770000  | 2.10024300  |
| H | 3.82759900  | -0.24597000 | 4.02135400  | C                                     | -1.46802900 | 2.19168800  | 1.91446600  |
| C | 4.07654700  | 0.22065400  | 1.87355100  | C                                     | -0.97274500 | 0.65761900  | 3.53450100  |
| H | 3.62219600  | 1.06021900  | 1.33765700  | C                                     | -1.54904200 | 2.95496100  | 3.20367600  |
| H | 5.09649400  | 0.51747600  | 2.12445400  | C                                     | -1.10499200 | 1.89353700  | 4.19464500  |
| C | 4.06713900  | -1.01393300 | 0.95193900  | H                                     | -2.57896000 | 3.28608700  | 3.40577900  |
| H | 4.84922700  | -1.71591200 | 1.26876000  | H                                     | -0.91651900 | 3.85242100  | 3.22383600  |
| C | 4.20861500  | -0.67132600 | -0.58990000 | C                                     | -0.83515400 | 1.98608100  | 5.55291700  |
| C | 5.32483700  | 0.39642600  | -0.73194000 | C                                     | -0.61945100 | -0.50318500 | 4.21751000  |
| C | 6.68481300  | 0.12103200  | -0.54329900 | C                                     | -0.45654600 | 0.82560300  | 6.24569000  |
| H | 7.01368800  | -0.89200800 | -0.33732200 | C                                     | -0.35735400 | -0.40633100 | 5.58787700  |
| C | 7.64042500  | 1.13497400  | -0.63821100 | H                                     | -0.92355500 | 2.93476700  | 6.07706400  |
| H | 8.69134800  | 0.89714000  | -0.49233200 | H                                     | -0.24855100 | 0.88300500  | 7.31083000  |
| C | 7.25254100  | 2.44467600  | -0.92637500 | H                                     | -0.07947700 | -1.29422200 | 6.14973700  |
| H | 7.99737900  | 3.23262100  | -1.00388900 | H                                     | -0.57433200 | -1.44983200 | 3.68614400  |
| C | 5.89903000  | 2.72891900  | -1.11603500 | O                                     | -1.21991300 | -0.12651000 | 1.25054000  |
| H | 5.58064100  | 3.74520900  | -1.33799300 | N                                     | 0.85003600  | 1.41746300  | 0.11379300  |
| C | 4.94562700  | 1.71467800  | -1.01804000 | O                                     | 1.28965600  | 2.55887900  | -1.80846800 |
| H | 3.89095800  | 1.92388400  | -1.15396700 | C                                     | 1.35763900  | 2.68953000  | -3.29580300 |
| C | 4.58523700  | -1.93049400 | -1.41384900 | C                                     | 2.42272700  | 3.77244800  | -3.45809800 |
| C | 5.49466200  | -2.91022200 | -0.98885400 | C                                     | 1.82674900  | 1.35756900  | -3.88360900 |
| H | 5.97900400  | -2.83208200 | -0.01991400 | C                                     | -0.00267800 | 3.14764300  | -3.81889900 |
| C | 5.78652600  | -4.01933100 | -1.78600400 | H                                     | 3.38491800  | 3.42571700  | -3.06884800 |
| H | 6.48992600  | -4.76713800 | -1.42802900 | H                                     | 2.15226400  | 1.51828100  | -4.91694000 |
| C | 5.17396100  | -4.17160600 | -3.02980200 | H                                     | 2.13160700  | 4.68006700  | -2.91959700 |
| H | 5.39695400  | -5.03615500 | -3.64950200 | H                                     | 2.54195500  | 4.01548800  | -4.51872700 |
| C | 4.26618900  | -3.20390800 | -3.46457500 | H                                     | 1.02785400  | 0.61380900  | -3.87869300 |
| H | 3.77630600  | -3.31167900 | -4.42930100 | H                                     | 2.66363100  | 0.96965700  | -3.29490100 |
| C | 3.97576300  | -2.09919800 | -2.66438300 | H                                     | -0.29768300 | 4.09036900  | -3.34508500 |
| H | 3.25278000  | -1.35742400 | -2.98185800 | H                                     | -0.77253400 | 2.39746000  | -3.62899100 |
| C | -2.62533000 | -2.81400200 | 0.08477300  | H                                     | 0.06611300  | 3.31618700  | -4.89905000 |
| H | -3.00384800 | -2.08605400 | 0.80757000  | C                                     | 0.90915600  | 2.29651600  | 1.08949900  |
| H | -3.38033900 | -3.61456200 | 0.02642900  | C                                     | 0.82506900  | 3.75799200  | 1.06107200  |
| C | -1.89943800 | -2.97422100 | -2.27302400 | C                                     | 0.14119200  | 4.50954300  | 0.08612900  |
| H | -0.84515800 | -3.12346600 | -2.04559400 | C                                     | 1.45883600  | 4.43953300  | 2.11835600  |
| H | -2.40085400 | -3.95547000 | -2.31726800 | C                                     | 0.11889000  | 5.89774300  | 0.16301800  |
| C | -2.14592700 | -2.16641800 | -3.53967500 | H                                     | -0.39627900 | 4.01315900  | -0.70873700 |
| H | -1.41764300 | -1.34750600 | -3.58880000 | C                                     | 1.44192200  | 5.83065500  | 2.18517500  |
| H | -2.03967800 | -2.76678300 | -4.44817100 | H                                     | 1.97508000  | 3.86772600  | 2.88573000  |
| C | -3.56693100 | -1.60494000 | -3.33517200 | C                                     | 0.77326300  | 6.56462100  | 1.20400500  |
| H | -3.64058200 | -0.57226900 | -3.67785900 | H                                     | -0.41973200 | 6.46496300  | -0.59084700 |
| H | -4.31409200 | -2.18940000 | -3.87984100 | H                                     | 1.94663400  | 6.33868900  | 3.00195500  |
| C | -3.84038700 | -1.68927600 | -1.80757100 | H                                     | 0.75359900  | 7.64975500  | 1.25296200  |
| H | -4.59051300 | -2.46415700 | -1.60322600 | H                                     | 1.31145200  | 1.88877100  | 2.01344100  |
| C | -4.27010400 | -0.29255300 | -1.22140300 | F                                     | -1.95058900 | 2.71534200  | 0.76042500  |
| C | -5.43537300 | 0.26461800  | -2.07193100 | <b>Int<sub>RR</sub>-Boc</b>           |             |             |             |
| C | -6.59737400 | -0.47279800 | -2.33744900 | G <sub>gas</sub> = -6750.434431 a.u.  |             |             |             |
| H | -6.70914400 | -1.47718500 | -1.93947700 | E <sub>solv</sub> = -6751.955398 a.u. |             |             |             |
| C | -7.62716900 | 0.06557800  | -3.10923800 | Zn                                    | -1.48796400 | -0.61649100 | -0.39307000 |
| H | -8.51803300 | -0.52604600 | -3.30668500 | Zn                                    | 1.47785300  | -0.55903200 | 0.12484600  |
| C | -7.51618800 | 1.35914600  | -3.62417400 | O                                     | -0.03094500 | -1.88091300 | 0.16824200  |
| H | -8.31910100 | 1.78112800  | -4.22351800 | O                                     | -3.18795000 | 0.14582000  | -0.05170100 |
| C | -6.36524300 | 2.10269000  | -3.35960800 | O                                     | 3.19973500  | -0.07570400 | -0.47887900 |
| H | -6.26766000 | 3.11181200  | -3.75389400 | N                                     | -2.51589000 | -2.21319900 | -1.30165800 |
| C | -5.33334600 | 1.55813900  | -2.59257400 | N                                     | 2.56328300  | -1.99846200 | 1.31928800  |
| H | -4.42859200 | 2.11739800  | -2.38387600 | C                                     | 0.00067200  | -3.22616100 | 0.15561400  |
| C | -4.79940300 | -0.39346900 | 0.23783000  | C                                     | 1.20786500  | -3.92429300 | 0.39389500  |
| C | -5.61132000 | -1.43293600 | 0.71368400  | C                                     | 1.20470800  | -5.32089000 | 0.41937300  |
| H | -5.89837000 | -2.25009000 | 0.05913200  | H                                     | 2.14480000  | -5.83632300 | 0.61032400  |
| C | -6.04440200 | -1.45730300 | 2.04075500  | C                                     | 0.05298300  | -6.07430400 | 0.18436500  |
| H | -6.66057700 | -2.28263700 | 2.38972700  | C                                     | -1.12152100 | -5.36995700 | -0.08793300 |
| C | -5.68396600 | -0.43265000 | 2.91771600  | H                                     | -2.03691700 | -5.92397000 | -0.29029200 |
| H | -6.01393800 | -0.45520500 | 3.95319300  | C                                     | -1.17497000 | -3.97439400 | -0.09618900 |
| C | -4.89630600 | 0.61961000  | 2.44786600  | C                                     | 0.07226900  | -7.58366100 | 0.24290400  |
| H | -4.60936000 | 1.42646300  | 3.11888900  | H                                     | -0.13431600 | -7.95179500 | 1.25741800  |
| C | -4.46498000 | 0.63869300  | 1.12183300  | H                                     | -0.68435500 | -8.02024500 | -0.41887200 |
| H | -3.84595000 | 1.44201600  | 0.74565700  | H                                     | 1.04796300  | -7.98476100 | -0.05395000 |
| O | -0.23858300 | 0.88362000  | -1.80472800 | C                                     | -2.51443500 | -3.30479700 | -0.30073800 |
|   |             |             |             | H                                     | -2.85360000 | -2.87620100 | 0.64418800  |

|   |             |             |             |                                       |             |             |             |
|---|-------------|-------------|-------------|---------------------------------------|-------------|-------------|-------------|
| H | -3.26264900 | -4.05929500 | -0.58881600 | C                                     | 1.34456900  | 1.95348100  | -2.46440100 |
| C | -1.98348900 | -2.60783200 | -2.62106400 | C                                     | -0.75494300 | 2.60632300  | -1.86574600 |
| H | -2.50128600 | -3.51208500 | -2.98191600 | C                                     | 1.24518700  | 3.37560300  | -2.91811800 |
| H | -0.91779600 | -2.83112900 | -2.53631400 | C                                     | -0.16415400 | 3.72204000  | -2.49746100 |
| C | -2.29469400 | -1.38802400 | -3.48749000 | H                                     | 1.40454500  | 3.47982600  | -4.00050300 |
| H | -1.49592100 | -0.64873600 | -3.36455900 | H                                     | 1.98655800  | 4.01780800  | -2.41911500 |
| H | -2.35771500 | -1.64010200 | -4.54968600 | C                                     | -0.85740200 | 4.91419500  | -2.62994500 |
| C | -3.62592900 | -0.84582200 | -2.90892800 | C                                     | -2.05686700 | 2.68394300  | -1.36714500 |
| H | -3.56500400 | 0.22961900  | -2.72441800 | C                                     | -2.16555000 | 4.99714500  | -2.13011900 |
| H | -4.46789600 | -1.01119700 | -3.58495800 | C                                     | -2.75334100 | 3.89112600  | -1.50982500 |
| C | -3.85009400 | -1.59992600 | -1.57015000 | H                                     | -0.39280700 | 5.77388600  | -3.10724800 |
| H | -4.58306300 | -2.40876000 | -1.70101400 | H                                     | -2.72544100 | 5.92299600  | -2.23476000 |
| C | -4.27622200 | -0.64093700 | -0.39268800 | H                                     | -3.77574300 | 3.95214700  | -1.14560900 |
| C | -5.45171800 | 0.25804000  | -0.83769200 | H                                     | -2.53903500 | 1.83261800  | -0.89517100 |
| C | -6.49506100 | -0.18551800 | -1.66099600 | O                                     | 0.02941600  | 0.29082700  | -1.30677300 |
| H | -6.49032200 | -1.19759900 | -2.05530300 | N                                     | 1.02059500  | 1.27320600  | 1.08274300  |
| C | -7.54930000 | 0.66271700  | -2.00620500 | O                                     | -0.30206700 | 2.31663200  | 2.63959800  |
| H | -8.34152700 | 0.29787100  | -2.65532900 | C                                     | -1.56571400 | 2.52558200  | 3.40309300  |
| C | -7.58424400 | 1.97221000  | -1.52619500 | C                                     | -1.26585000 | 3.82498600  | 4.14872300  |
| H | -8.40358900 | 2.63372600  | -1.79516000 | C                                     | -2.74160400 | 2.69778100  | 2.43647200  |
| C | -6.55415300 | 2.42203200  | -0.69769900 | C                                     | -1.76477400 | 1.36008100  | 4.37345300  |
| H | -6.57004800 | 3.43925900  | -0.31272800 | H                                     | -1.03888200 | 4.62766200  | 3.44020800  |
| C | -5.50074400 | 1.57305100  | -0.35932000 | H                                     | -3.64873900 | 2.89034100  | 3.01981700  |
| H | -4.69595700 | 1.91845100  | 0.27821600  | H                                     | -0.40630300 | 3.69999500  | 4.81483400  |
| C | -4.76703100 | -1.43830100 | 0.84612600  | H                                     | -2.13428800 | 4.11782200  | 4.74728600  |
| C | -5.80442300 | -2.37785100 | 0.78279800  | H                                     | -2.90531100 | 1.81093700  | 1.82126200  |
| H | -6.31694000 | -2.56202100 | -0.15686900 | H                                     | -2.57885500 | 3.55584400  | 1.77588000  |
| C | -6.20269300 | -3.08236900 | 1.91952300  | H                                     | -0.86796400 | 1.22168000  | 4.98684800  |
| H | -7.00677200 | -3.81068100 | 1.84680300  | H                                     | -1.97814400 | 0.43216200  | 3.84176900  |
| C | -5.57504300 | -2.85289400 | 3.14607500  | H                                     | -2.60544600 | 1.58527100  | 5.03837400  |
| H | -5.88471700 | -3.40242100 | 4.03125000  | C                                     | 1.75758500  | 2.26030900  | 0.64890000  |
| C | -4.54964600 | -1.90904700 | 3.22191600  | C                                     | 1.57396100  | 3.70300900  | 0.59626500  |
| H | -4.05303800 | -1.71829600 | 4.17070700  | C                                     | 0.34130900  | 4.37988700  | 0.66348800  |
| C | -4.15169300 | -1.20783300 | 2.08249900  | C                                     | 2.75383500  | 4.45282100  | 0.39827100  |
| H | -3.34080200 | -0.49076400 | 2.12067700  | C                                     | 0.29903600  | 5.76595400  | 0.56948800  |
| C | 2.53992000  | -3.21464600 | 0.48292600  | H                                     | -0.58166800 | 3.82489200  | 0.73430900  |
| H | 2.84826000  | -2.91413400 | -0.52214100 | C                                     | 2.70760900  | 5.84177700  | 0.32636900  |
| H | 3.30721600  | -3.91970700 | 0.83992500  | H                                     | 3.70531600  | 3.93197300  | 0.31710500  |
| C | 2.09203500  | -2.20777400 | 2.69885500  | C                                     | 1.47837700  | 6.50105000  | 0.41499000  |
| H | 1.01769300  | -2.40538100 | 2.69222100  | H                                     | -0.66169300 | 6.27079900  | 0.59066200  |
| H | 2.60168400  | -3.07776600 | 3.14605900  | H                                     | 3.62479500  | 6.40761400  | 0.19088600  |
| C | 2.48274000  | -0.90490200 | 3.40949400  | H                                     | 1.43711200  | 7.58469900  | 0.34491700  |
| H | 1.65703200  | -0.18788900 | 3.36217200  | H                                     | 2.70637700  | 1.89859500  | 0.25085400  |
| H | 2.70701100  | -1.07506500 | 4.46640600  | F                                     | 2.45684700  | 1.24599300  | -2.72919200 |
| C | 3.70390300  | -0.37707500 | 2.61230000  |                                       |             |             |             |
| H | 3.51093400  | 0.62457400  | 2.22084800  | <b>TS<sub>RR</sub>-Boc</b>            |             |             |             |
| H | 4.60537000  | -0.31108900 | 3.22447600  | E <sub>gas</sub> = -6750.419762 a.u.  |             |             |             |
| C | 3.90330100  | -1.36466200 | 1.43821800  | E <sub>solv</sub> = -6751.941303 a.u. |             |             |             |
| H | 4.63413900  | -2.13602000 | 1.72357700  | Zn                                    | 1.53323600  | -0.07402400 | 0.48929400  |
| C | 4.30986500  | -0.68371600 | 0.07055600  | Zn                                    | -1.68599900 | -0.70860900 | -0.12442000 |
| C | 5.40574300  | 0.38561300  | 0.29343300  | O                                     | -0.22203300 | -0.92094200 | 1.17752600  |
| C | 6.47250000  | 0.22850100  | 1.18664000  | O                                     | 2.80062000  | -0.82780100 | -0.73299000 |
| H | 6.55719900  | -0.67570800 | 1.78304900  | O                                     | -3.21088500 | 0.11576600  | -0.86091600 |
| C | 7.43658200  | 1.22774100  | 1.33643200  | N                                     | 2.78658100  | -0.98837800 | 1.99725600  |
| H | 8.24902900  | 1.08916400  | 2.04561600  | N                                     | -2.98920300 | -1.82300100 | 1.05242600  |
| C | 7.35851400  | 2.39902100  | 0.58169000  | C                                     | -0.38524600 | -1.28664200 | 2.47495300  |
| H | 8.10854200  | 3.17710100  | 0.69778100  | C                                     | -1.65621200 | -1.30923900 | 3.09514800  |
| C | 6.31362500  | 2.55364800  | -0.33245600 | C                                     | -1.76259500 | -1.62362500 | 4.45343700  |
| H | 6.25413600  | 3.45141800  | -0.94425000 | H                                     | -2.75310100 | -1.62467300 | 4.90556300  |
| C | 5.34811800  | 1.55588400  | -0.47653100 | C                                     | -0.65623000 | -1.94158200 | 5.24071800  |
| H | 4.54113700  | 1.65560000  | -1.19486800 | C                                     | 0.57433300  | -2.02984500 | 4.58606200  |
| C | 4.90660300  | -1.71248900 | -0.92750900 | H                                     | 1.44904200  | -2.36672300 | 5.14007400  |
| C | 5.91047800  | -2.62470800 | -0.57764000 | C                                     | 0.72140200  | -1.74814800 | 3.22738200  |
| H | 6.31402500  | -2.63437200 | 0.43104500  | C                                     | -0.78597500 | -2.20698300 | 6.72126900  |
| C | 6.41488100  | -3.52858300 | -1.51387400 | H                                     | -0.61904300 | -1.29395400 | 7.30895100  |
| H | 7.18837200  | -4.23381600 | -1.21915400 | H                                     | -1.78483900 | -2.57797600 | 6.97726000  |
| C | 5.93058200  | -3.52642100 | -2.82338600 | H                                     | -0.05444600 | -2.94851200 | 7.06235700  |
| H | 6.32089400  | -4.23149100 | -3.55285900 | C                                     | 2.00683900  | -2.11885200 | 2.53640600  |
| C | 4.94660400  | -2.60498800 | -3.18687900 | H                                     | 1.76351300  | -2.77146300 | 1.69780300  |
| H | 4.56882400  | -2.58670300 | -4.20644500 | H                                     | 2.63977900  | -2.70077300 | 3.22598400  |
| C | 4.44102600  | -1.70385700 | -2.24850000 | C                                     | 3.26583800  | -0.06797600 | 3.05050600  |
| H | 3.67628500  | -0.98254900 | -2.51490500 | H                                     | 3.70094700  | -0.64821500 | 3.88237300  |
| O | -1.00890200 | 0.41662900  | 1.63122100  | H                                     | 2.42945200  | 0.52158800  | 3.42956100  |
| C | -0.19009600 | 1.32040700  | 1.77166900  |                                       |             |             |             |
| C | 0.21720700  | 1.48872800  | -1.84855800 |                                       |             |             |             |

|   |             |             |             |   |             |             |             |
|---|-------------|-------------|-------------|---|-------------|-------------|-------------|
| C | 4.32734400  | 0.76402400  | 2.33541500  | C | 0.81042500  | 2.75294700  | 1.03574900  |
| H | 3.83389800  | 1.57656500  | 1.79698300  | C | -0.32600000 | 2.89896500  | 0.23666600  |
| H | 5.04965500  | 1.19933800  | 3.03289800  | C | 1.29187400  | 4.12414200  | 1.28705200  |
| C | 4.96777400  | -0.22309000 | 1.33452600  | C | -0.78803400 | 4.32268200  | 0.11839000  |
| H | 5.09335200  | 0.23467600  | 0.35160200  | C | 0.37677300  | 5.05285000  | 0.75928900  |
| H | 5.95674200  | -0.55707600 | 1.66000900  | H | -1.72999800 | 4.48346900  | 0.66414000  |
| C | 4.00129200  | -1.43343400 | 1.24818700  | H | -0.96355400 | 4.64538500  | -0.91763700 |
| H | 4.43269100  | -2.29463800 | 1.77820000  | C | 0.64358500  | 6.41384800  | 0.83123100  |
| C | 3.62255300  | -1.81660700 | -0.23312800 | C | 2.47084500  | 4.53467200  | 1.90338200  |
| C | 4.90455600  | -1.90986800 | -1.09086600 | C | 1.82687700  | 6.83333600  | 1.45309300  |
| C | 6.08724300  | -2.51736300 | -0.64737800 | C | 2.73097700  | 5.90365600  | 1.98370200  |
| H | 6.14804000  | -2.93270700 | 0.35472800  | H | -0.04874300 | 7.14191100  | 0.41533700  |
| C | 7.21240800  | -2.58324500 | -1.47078200 | H | 2.04656400  | 7.89536000  | 1.52419700  |
| H | 8.12164600  | -3.05266300 | -1.10275200 | H | 3.64460700  | 6.25424900  | 2.45612600  |
| C | 7.17347400  | -2.04389800 | -2.75780200 | H | 3.16527600  | 3.79799300  | 2.29406700  |
| H | 8.04935500  | -2.09390600 | -3.39974700 | O | 1.42274100  | 1.69507900  | 1.40631500  |
| C | 6.00030300  | -1.43544600 | -3.20802100 | N | 0.83932100  | 0.93939500  | -1.43139500 |
| H | 5.95860700  | -1.00684300 | -4.20675400 | O | -0.02103400 | 0.48632100  | -3.47122200 |
| C | 4.87865200  | -1.36795600 | -2.38078900 | C | -0.80625000 | -0.29774100 | -4.45836100 |
| H | 3.96532100  | -0.88500600 | -2.70923600 | C | -0.45539600 | 0.41003500  | -5.76760900 |
| C | 2.91684300  | -3.20150200 | -0.30832100 | C | -0.32350000 | -1.75102100 | -4.48507800 |
| C | 3.46116200  | -4.37344500 | 0.23604400  | C | -2.29221900 | -0.16357800 | -4.13439400 |
| H | 4.43218000  | -4.35030800 | 0.72118800  | H | 0.61623700  | 0.33079600  | -5.97596200 |
| C | 2.76967200  | -5.58388900 | 0.17182100  | H | -0.73787500 | -2.24646800 | -5.36994100 |
| H | 3.20804400  | -6.47742000 | 0.60987100  | H | -0.72148900 | 1.47040200  | -5.71233400 |
| C | 1.52161600  | -5.65048900 | -0.45247800 | H | -1.00878400 | -0.04498800 | -6.59534300 |
| H | 0.98274900  | -6.59333200 | -0.50165700 | H | -0.63704700 | -2.29750000 | -3.59595600 |
| C | 0.98193000  | -4.49450200 | -1.01822900 | H | 0.76903700  | -1.78668800 | -4.55051800 |
| H | 0.01928400  | -4.53159000 | -1.52393600 | H | -2.59720700 | 0.88625100  | -4.19726300 |
| C | 1.67423400  | -3.28418500 | -0.94796500 | H | -2.52826000 | -0.52075300 | -3.13104100 |
| H | 1.25020600  | -2.38196800 | -1.36856500 | H | -2.88129600 | -0.73201700 | -4.86251500 |
| C | -2.92545000 | -1.05320400 | 2.32110300  | C | 0.98093200  | 2.23535300  | -1.69915000 |
| H | -3.02616400 | 0.00594200  | 2.06773300  | C | 2.24020400  | 2.94447900  | -1.53230700 |
| H | -3.79765700 | -1.30077400 | 2.94266100  | C | 3.41256100  | 2.26890200  | -1.14291900 |
| C | -2.74088100 | -3.27290000 | 1.18302300  | C | 2.29024300  | 4.32928900  | -1.78421600 |
| H | -1.71024800 | -3.45300700 | 1.49301800  | C | 4.59880600  | 2.98211700  | -0.98553800 |
| H | -3.41292100 | -3.70149900 | 1.94378100  | C | 3.39065400  | 1.18901400  | -1.01480700 |
| C | -3.05949300 | -3.79581400 | -0.22114100 | C | 3.47710400  | 5.03307000  | -1.61930800 |
| H | -2.15481000 | -3.75254100 | -0.83801200 | H | 1.38797100  | 4.85032300  | -2.09384300 |
| H | -3.39190300 | -4.83731900 | -0.20214200 | C | 4.63441600  | 4.36015300  | -1.21352200 |
| C | -4.13635500 | -2.82036400 | -0.76462400 | H | 5.50311600  | 2.45452100  | -0.69427900 |
| H | -3.82259800 | -2.37482000 | -1.71271500 | H | 3.50077400  | 6.10401600  | -1.79784200 |
| H | -5.09688900 | -3.30862000 | -0.93933300 | H | 5.56322200  | 4.90976500  | -1.08512100 |
| C | -4.27057500 | -1.70666300 | 0.30178000  | H | 0.22866000  | 2.72423400  | -2.32307500 |
| H | -5.09401000 | -1.93969200 | 0.99029200  | F | -1.21089200 | 1.88596300  | 0.01677900  |
| C | -4.42826000 | -0.26596300 | -0.31356500 |   |             |             |             |
| C | -5.51883500 | -0.28116000 | -1.40942200 |   |             |             |             |
| C | -6.71969600 | -0.99262600 | -1.28584200 |   |             |             |             |
| H | -6.91009000 | -1.59787900 | -0.40395900 |   |             |             |             |
| C | -7.68689000 | -0.94638900 | -2.29111600 |   |             |             |             |
| H | -8.60719200 | -1.51427600 | -2.17834800 |   |             |             |             |
| C | -7.47422500 | -0.17634800 | -3.43588900 |   |             |             |             |
| H | -8.22664000 | -0.14014100 | -4.21945500 |   |             |             |             |
| C | -6.28738500 | 0.54814100  | -3.56068200 |   |             |             |             |
| H | -6.11122100 | 1.15697800  | -4.44441600 |   |             |             |             |
| C | -5.32169200 | 0.49598300  | -2.55519300 |   |             |             |             |
| H | -4.39671100 | 1.05223300  | -2.63815600 |   |             |             |             |
| C | -4.90870100 | 0.76609200  | 0.74402300  |   |             |             |             |
| C | -5.96265400 | 0.51741000  | 1.63379900  |   |             |             |             |
| H | -6.48808800 | -0.43264300 | 1.60932600  |   |             |             |             |
| C | -6.36227600 | 1.48113500  | 2.56068700  |   |             |             |             |
| H | -7.17681000 | 1.26201600  | 3.24679400  |   |             |             |             |
| C | -5.72254000 | 2.72137600  | 2.60611000  |   |             |             |             |
| H | -6.03103900 | 3.47150500  | 3.32955600  |   |             |             |             |
| C | -4.68823100 | 2.98720600  | 1.70748700  |   |             |             |             |
| H | -4.18748900 | 3.95309000  | 1.72561300  |   |             |             |             |
| C | -4.28857200 | 2.02029000  | 0.78406100  |   |             |             |             |
| H | -3.47942100 | 2.20923100  | 0.09164600  |   |             |             |             |
| O | -0.52346700 | -0.87293500 | -1.72740000 |   |             |             |             |
| C | 0.04251600  | 0.15606900  | -2.18332600 |   |             |             |             |
